# Supplementary material for: Single-cell transcriptomic reveals molecular diversity and developmental heterogeneity of human stem cell-derived oligodendrocyte lineage cells
Source: PubMed Central journal article supplement (PMC7844020; doi:10.1038/s41467-021-20892-3), 2021-01-28
Supplement: 41467_2021_20892_MOESM1_ESM.pdf [file 41467_2021_20892_MOESM1_ESM.pdf]

SUPPLEMENTARY INFORMATION- *Chamling et al.*

**Single-Cell Transcriptomic Reveals Molecular Diversity and Developmental Heterogeneity of Human Stem Cell-derived Oligodendrocyte Lineage Cells**

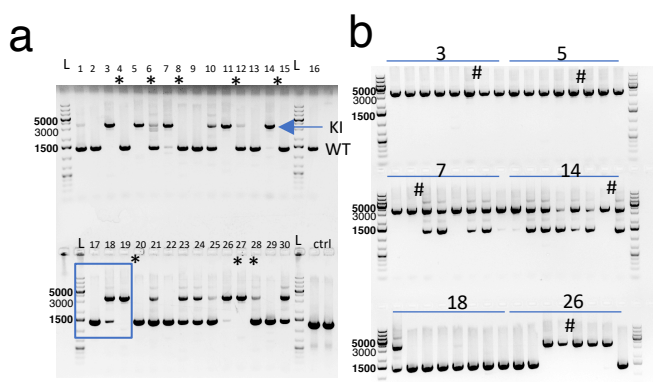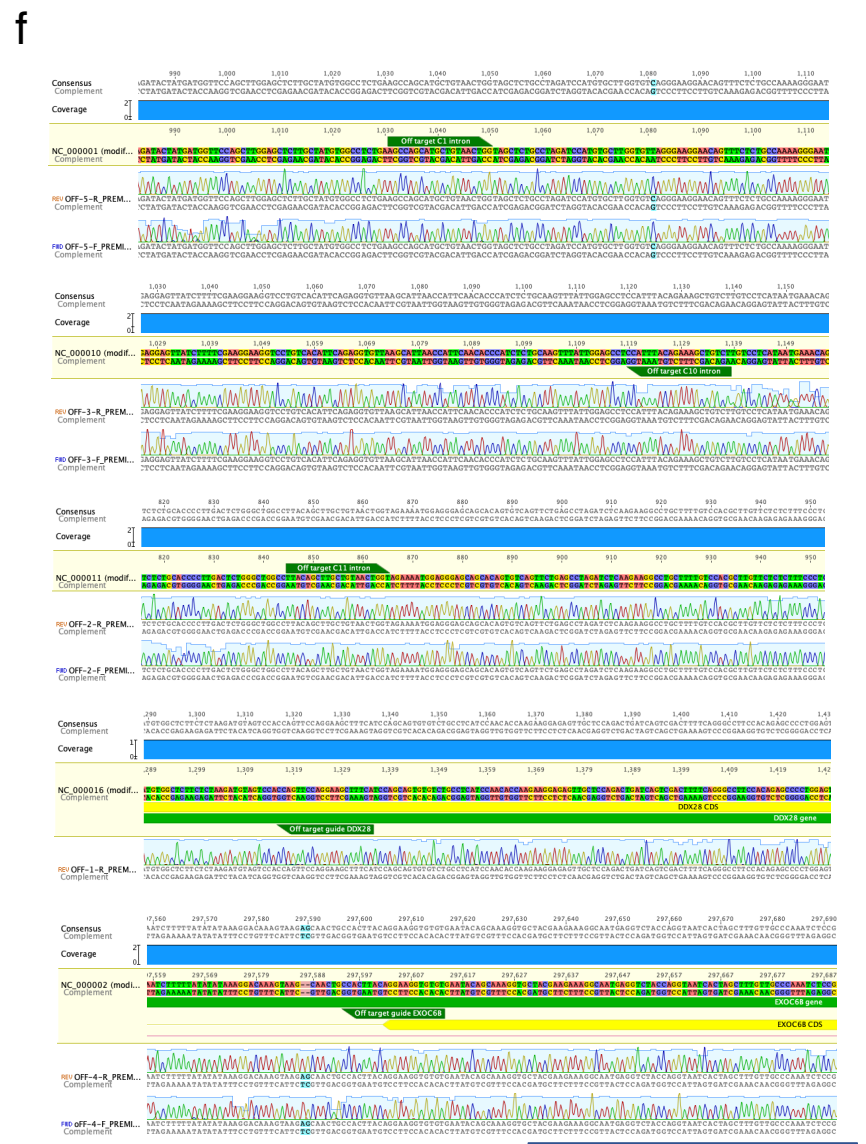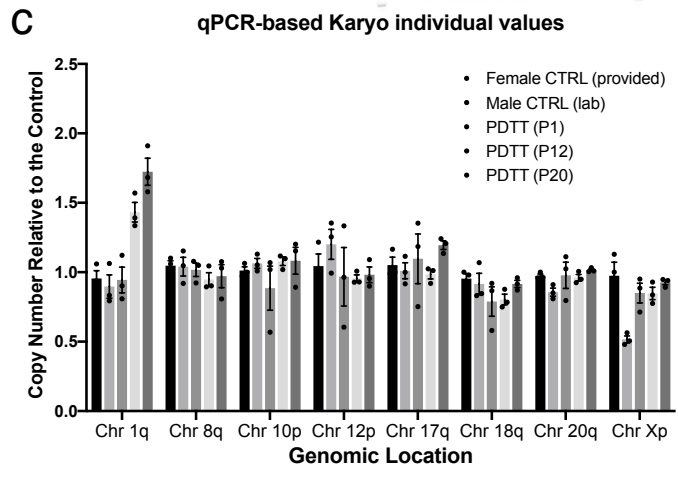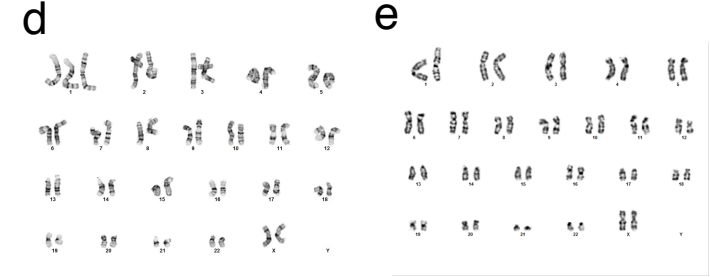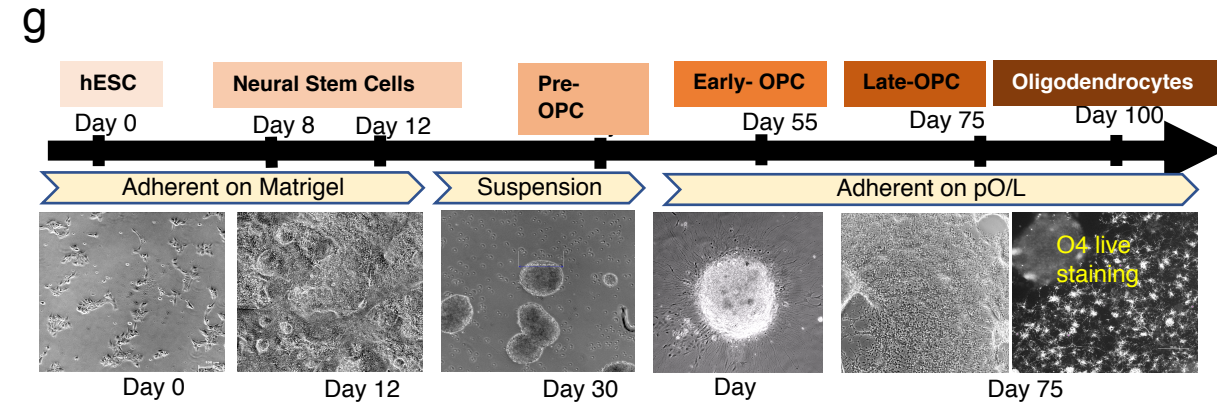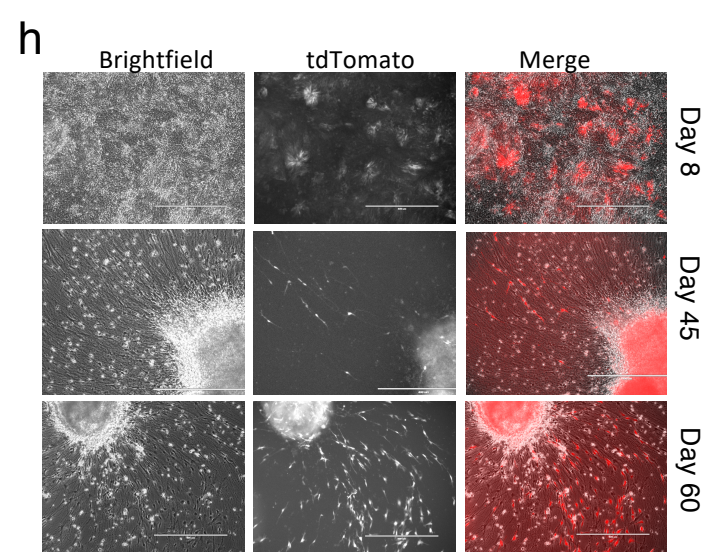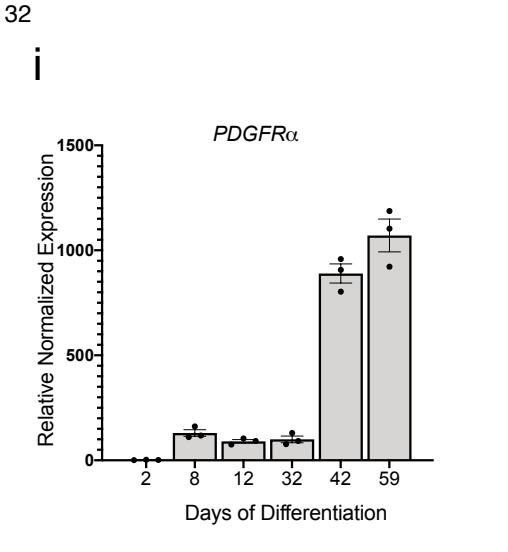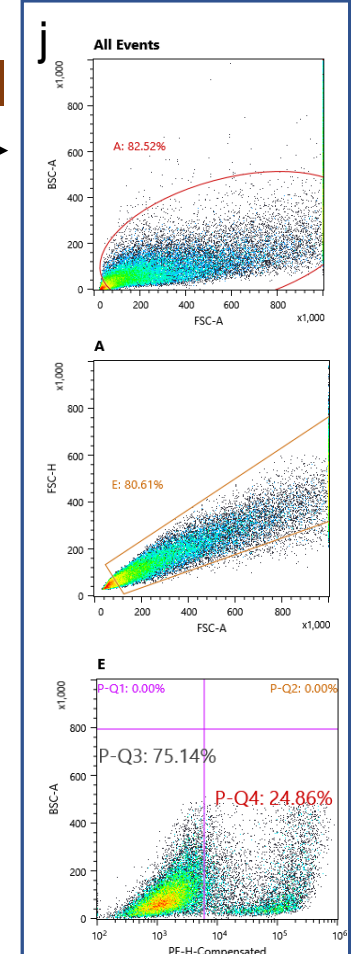



**Supplementary Figure 1. Generation and differentiation of the PDGFR $\alpha$  reporter (PD-TT) cell line.**

**a)** PCR-based genotyping of thirty single cell-derived colonies. Eighteen colonies seem to have at least some cells with the reporter sequence knocked-in, and at least eight of them appear to have homozygous integration (marked with \*). Box represents the image that is included in Fig. 1b. **b)** Eight sub-colonies from six initial colonies were re-genotyped to ensure clonal homozygous knock-in. **c)** qPCR-based genetic analysis shows normal karyotype of the PD-TT reporter cells at passage 1, but abnormality in the chromosome 1q after passage 12. Data is presented as mean  $\pm$  SEM. This experiment was repeated once (n=1 biological sample, with 3 technical replicates) as a part of routine karyotype screen before sending samples for G-banding karyotyping. **d)** Further analysis by G-banding showed isochromosome duplication of long arm of chromosome 1 in 50% of the clones analyzed in cells as early as passage #10. **e)** Karyotype of the hiPSC line used for OPC differentiation and scRNAseq was normal. **f)** Top five potential off target locations were selected based on the prediction generated by Deskgen.com. The genomic regions were amplified by PCR and Sanger sequenced to show that there were no off-target mutations at these loci in the reporter line. Note that the discrepancy in the last sequence is due to a known polymorphism (Rs1553417099), an intron variant caused due to insertion of AG at chr2:72465144. **g)** Timeline of the differentiation protocol with images at different stages of differentiation. At Day 75, the majority of the OPCs that migrate out from the neurospheres plated on day 30 are O4 positive. **h)** tdTomato expression (driven by PDGFR $\alpha$ ) is observed as early as day 8 on the neuroepithelial layer of the differentiating culture. However, individual, PDGFR $\alpha$ -tdTomato positive cells emerge from the neurospheres around day 45, rapidly divide and migrate out as seen in the day 60 culture. Scale bar: 400  $\mu$ m. **g-h)** were independently repeated 10 times with similar results. **i)** qPCR analysis of the PDGFR $\alpha$  mRNA level coincides with the tdTomato expression in the cultures. n=3 independent differentiations, data is presented as mean  $\pm$  SEM. **j)** An example of gating strategy used for the flow analysis of the tdTomato expressing cells.



**Supplementary Figure 2. Purified reporter cells express OPC markers and have the characteristics of PDGFR $\alpha$ + OPC morphology.** **a)** Day 80 MACS purified reporter cells plated on laminin coated surface and imaged 1-day post purification (pp) (**top**) are tdTomato+ and morphologically resemble bipolar OPCs (arrow). When cultured in mitogen free media, within 14 days, the cells start maturing (**bottom**). tdTomato expression is decreased and, in many cells, processes resembling OLs start emerging (arrowheads). Instead of thin processes, some cells are flatter with thicker branches resembling astrocytes (double arrow). pp: post purification. Scale bar 200  $\mu$ m. **b)** Immunostaining to show the MACS purified tdTomato+ cells express OLIG2. Scale bar: 100  $\mu$ m. **c)** High resolution (40X) images showing PDGFR $\alpha$  localizes to the cell membrane and tdTomato in the cytoplasm. Scale bar: 100  $\mu$ m **a**, **b**, and **c** were independently repeated 5, 2 and 3 times respectively with similar results.



**a**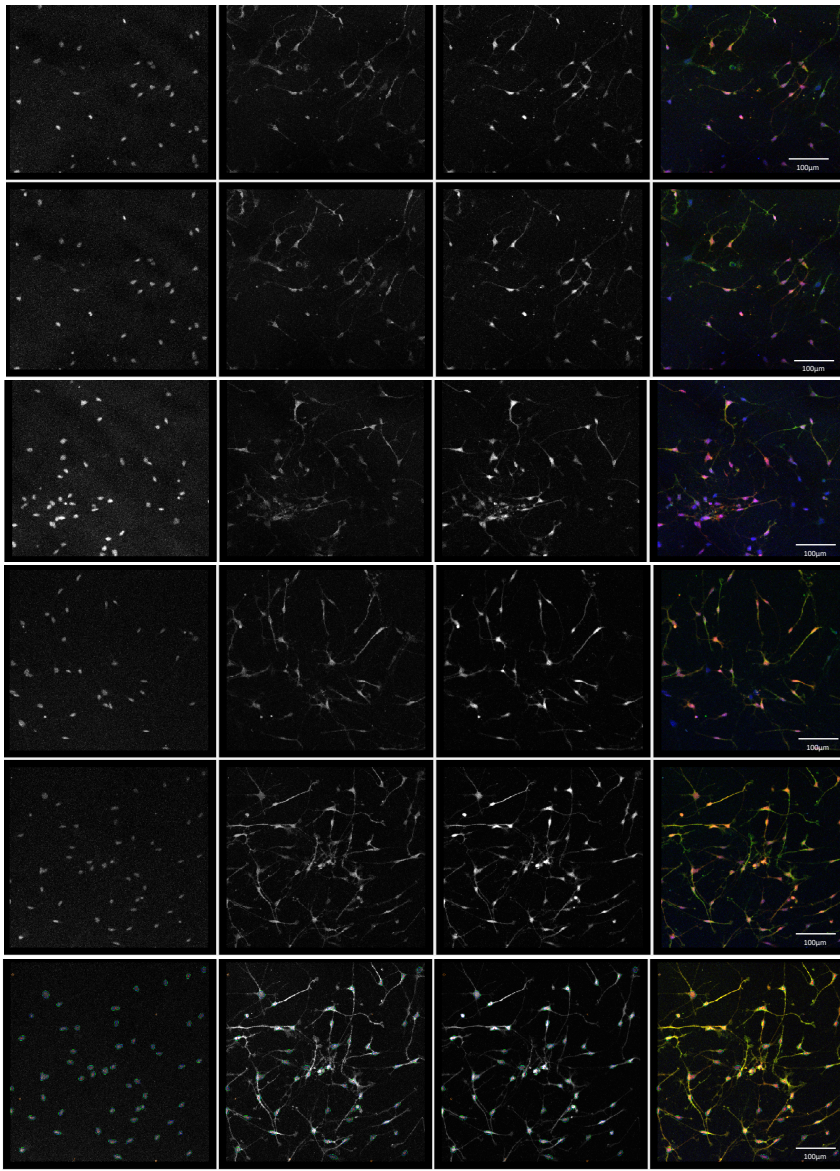**b**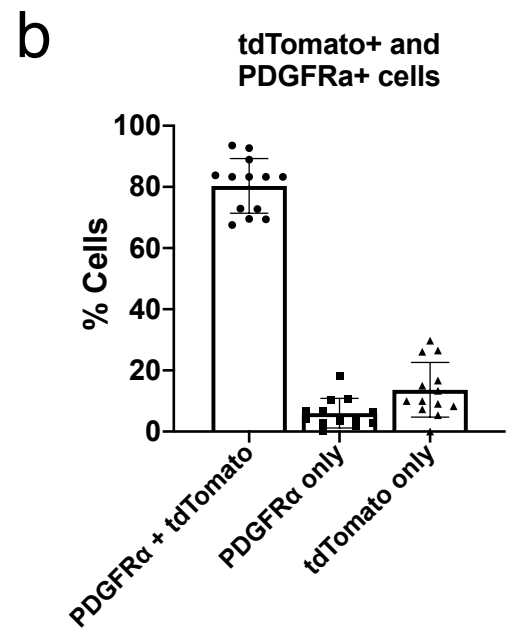**c**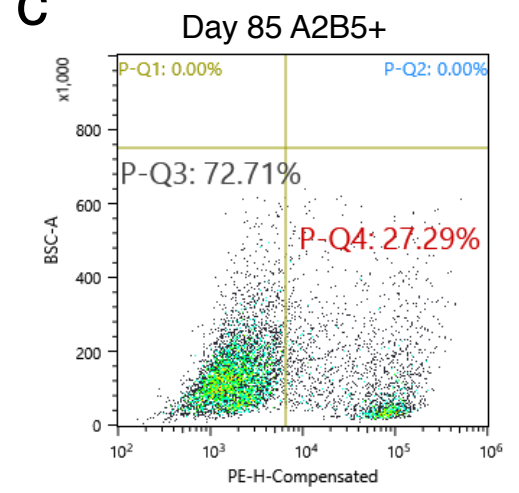**d**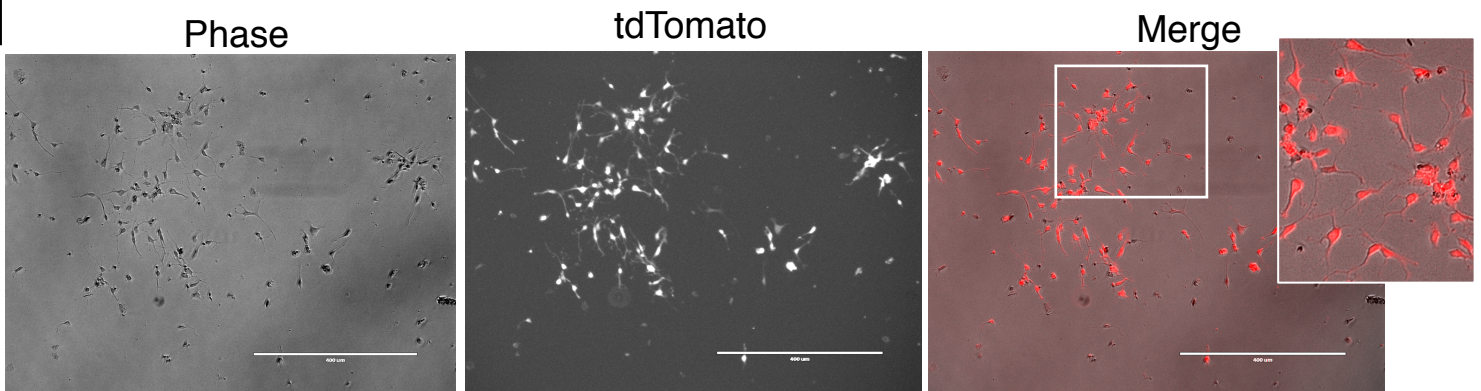**e**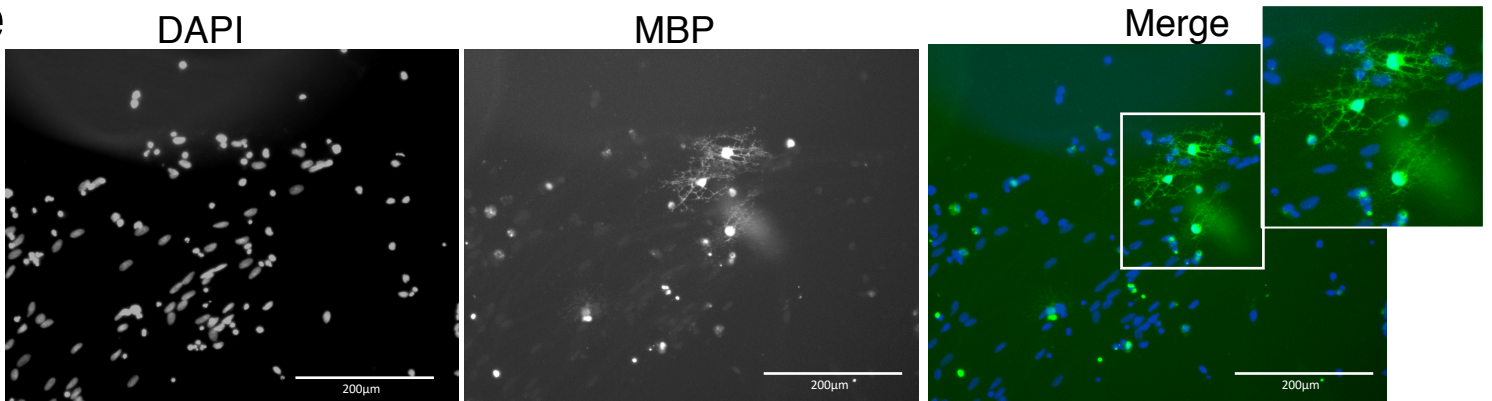

**Supplementary Figure 3. tdTomato+ OPCs express PDGFR $\alpha$  and maintain competence after freezing. a-b)** Quantification of tdTomato and PDGFR $\alpha$  double positive cells. **a)** Example of the images used for quantification. The last panel marked with \* shows example of masks that were used to quantify the overlaps. Scale bar: 100  $\mu$ m. **b)** We find ~80% overlap between cells that express tdTomato and PDGFR $\alpha$ . Cellomics ArrayScan software (ThermoFisher) was used to quantify the overlaps. Data is presented as mean  $\pm$ SD. n= 13 images from 3 independent experiments. Source data used to calculate the overlap are provided as a Source Data file. **c)** PD-TT cells at day 77 of differentiation, enriched using A2B5 microbeads were FACS analyzed for the expression of tdTomato. ~27% of A2B5+ cells also express tdTomato. PE in X-axis represents PDGFR $\alpha$ -tdTomato. The same gate (left panel of **c)**) was used for this flow analysis. Gating strategy is further detailed in figure S1j and described in the methods section. **d)** MACS purified and cryopreserved OPCs that were revived and plated on PLO-laminin coated plates for two days. Scale bar: 400  $\mu$ m. **e)** Cryopreserved cells mature into MBP+ OLs within three weeks in mitogen-free glial media. Scale bar: 200  $\mu$ m **d)** was independently repeated 5 times and **e)** 2 was independently repeated twice with similar results.

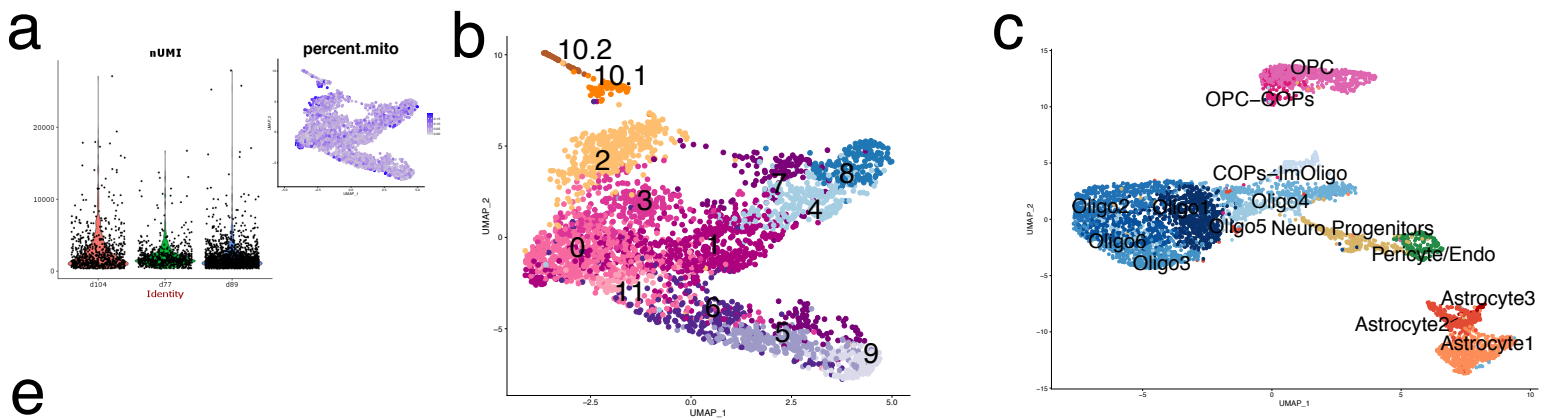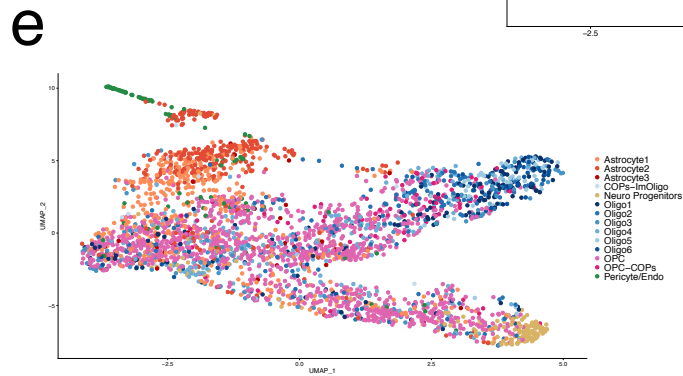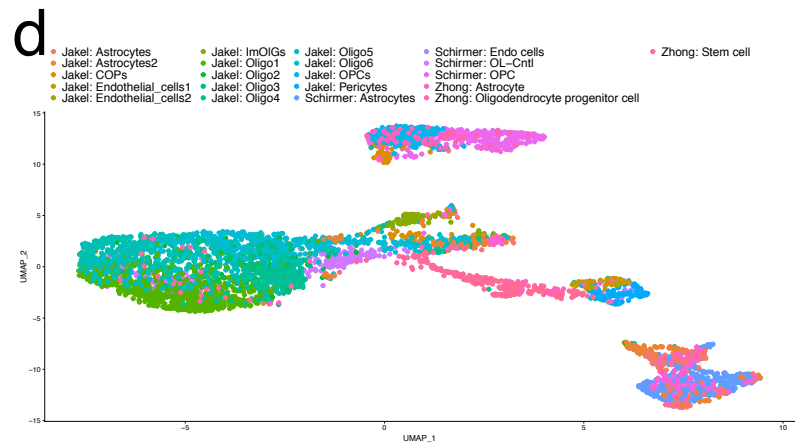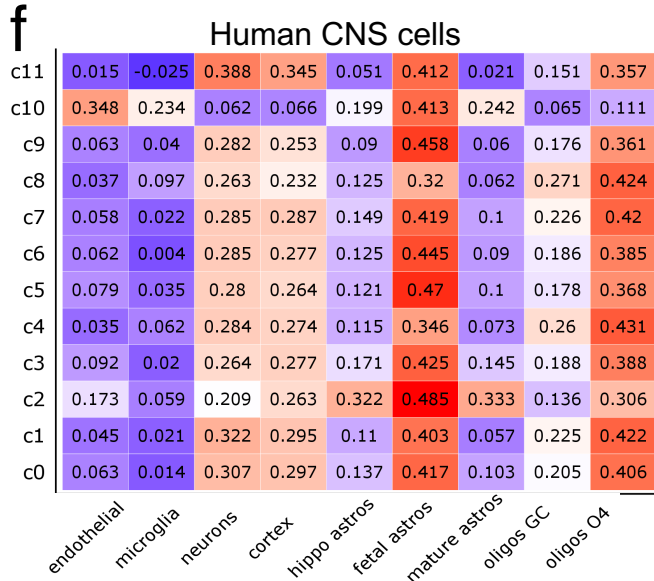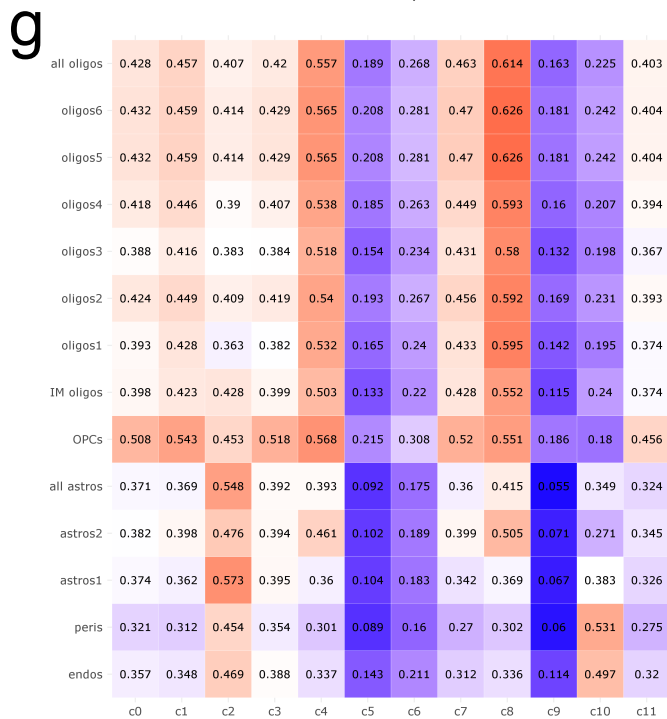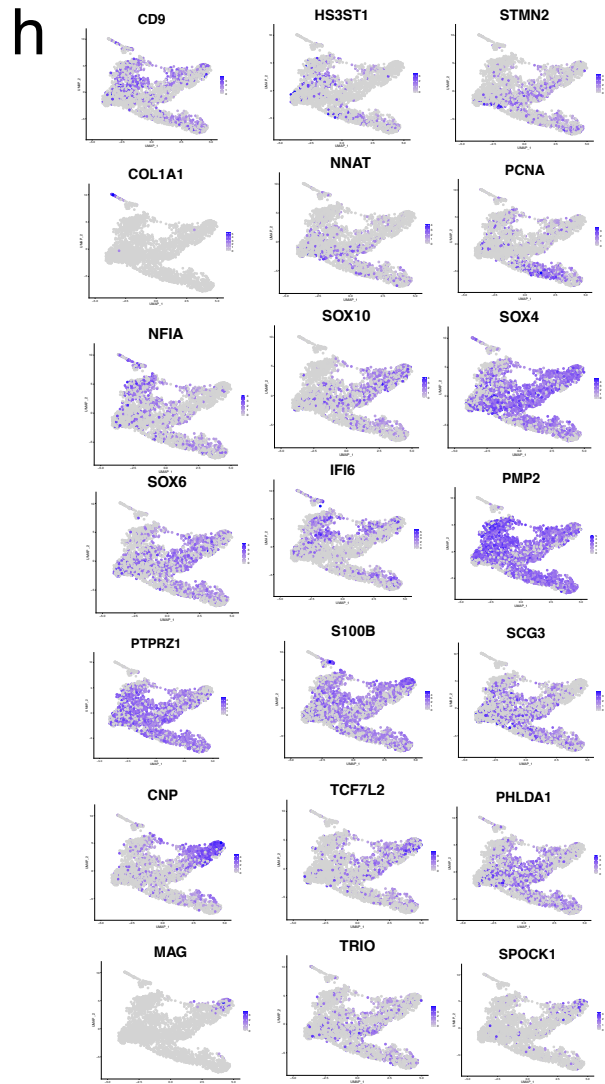



**Supplementary Figure 4. Data integration, label prediction and cluster assignment.**

Quality control metrics applied to the scRNA seq data of MACs purified PD-TT derived OPCs. **a)** Violin plot showing number of UMIs by age and an enrichment heatmap for percent mitochondrial gene content per cell. **b)** Unbiased clustering of the single cell transcriptome divided the cell into 13 clusters (0-9, 10.1, 10.2, and 11). **c-d)** A reference UMAP plot generated by integrating snRNAseq-based transcriptome from three previously published datasets show 15 different clusters **c)** and the source dataset for each cell is labelled **d)**. **e)** Assignment of predicted label to each cell in our dataset. **f and g)** Spearman correlation of single cell transcriptome-based clusters with bulk RNAseq<sup>35</sup> **f)** and snRNAseq<sup>32</sup> **g)** data from primary human brain cells. “All oligos” and “all astros” in **g)** are weighted averages of all 6 oligos or both astro sub-populations. Red color represents higher and blue is used for lower probability. Red color represents higher and blue is used for lower probability. **h)** Distribution of various genetic markers among the different clusters presented as an enrichment heatmap.

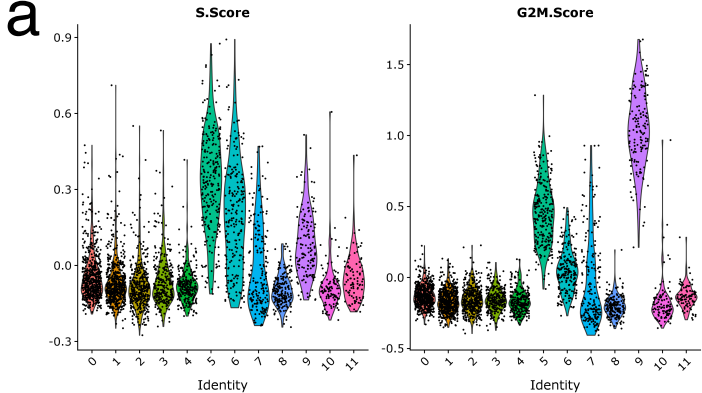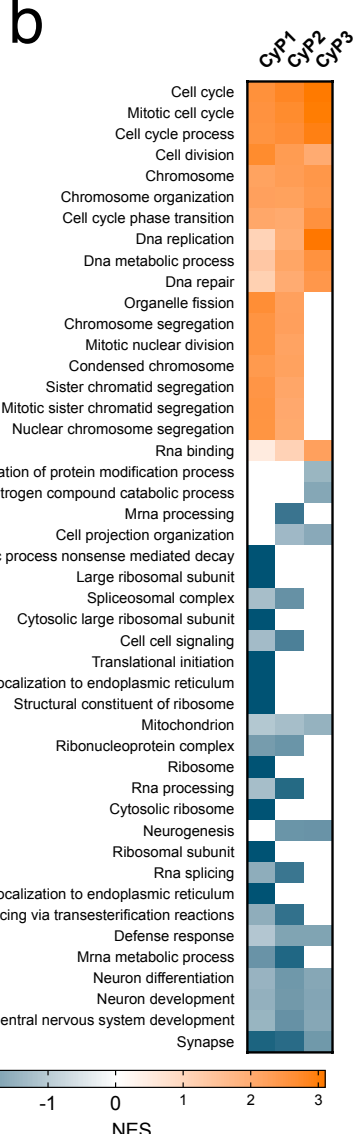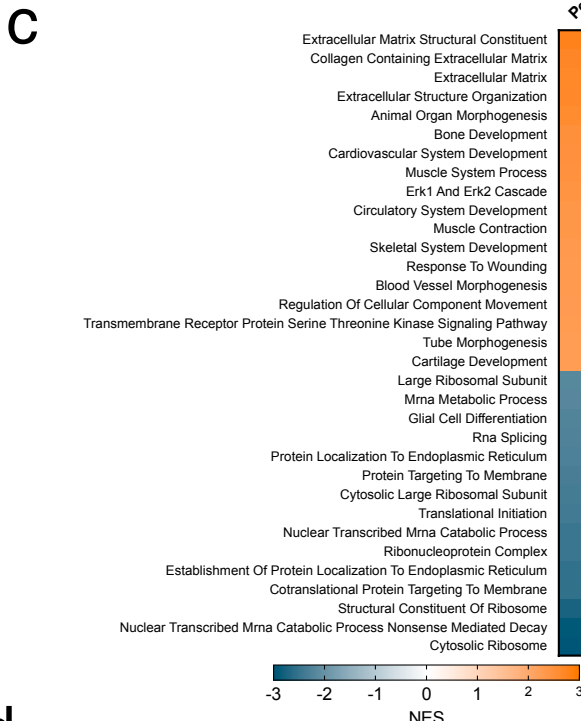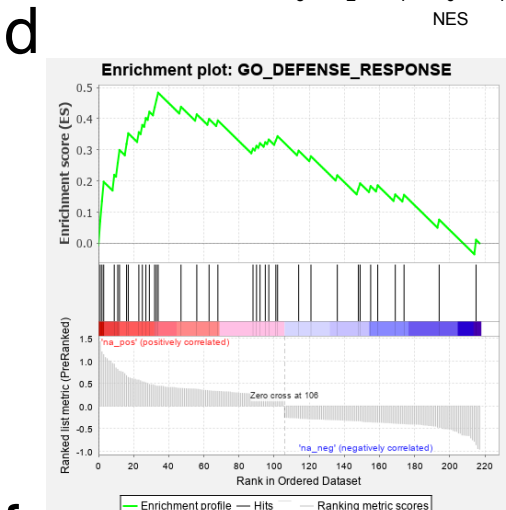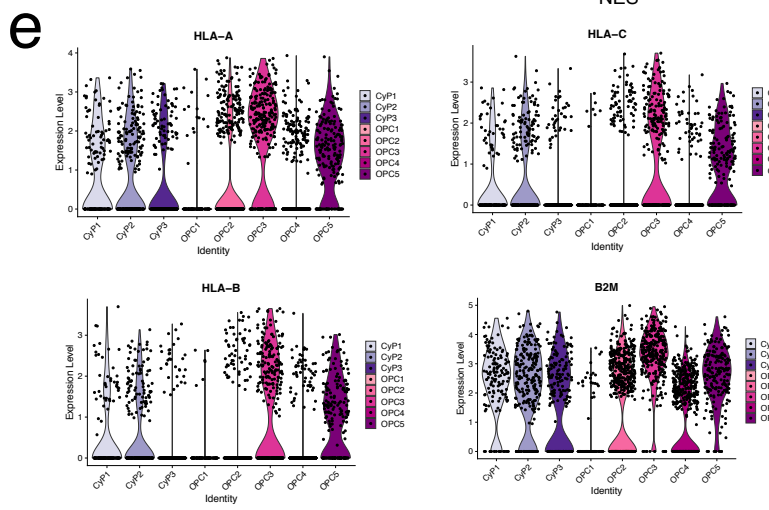

**f**

| Cell Count |     |     |       |            |      |
|------------|-----|-----|-------|------------|------|
|            | PLP |     | Total |            |      |
|            | MBP | 1   | GFAP  | AQP4 cell# |      |
| d77        | 187 | 248 | 61    | 33         | 691  |
| d89        | 350 | 600 | 553   | 125        | 1803 |
| d104       | 196 | 321 | 287   | 108        | 777  |

  

| Percentage |     |    |      |      |
|------------|-----|----|------|------|
| %          | PLP |    |      |      |
|            | MBP | 1  | GFAP | AQP4 |
| d77        | 27  | 36 | 9    | 5    |
| d89        | 19  | 33 | 31   | 7    |
| d104       | 25  | 41 | 37   | 14   |

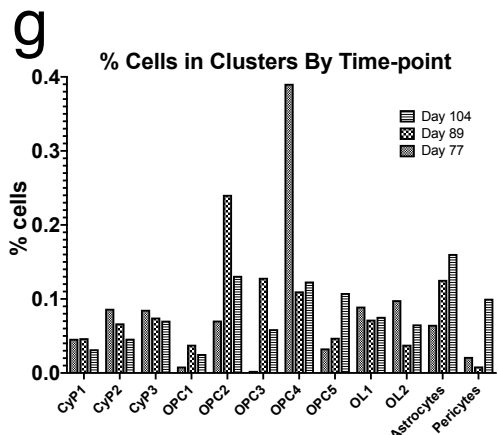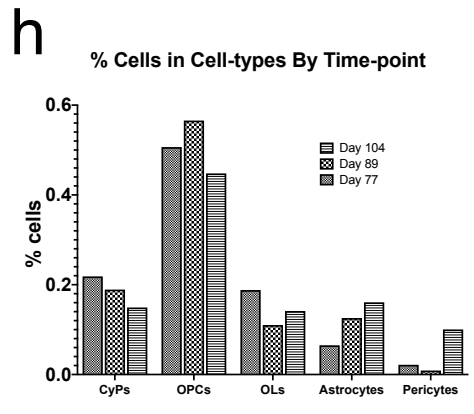

**Supplementary Figure 5. GSEA of the scRNAseq data and PDDT reporter cells at different differentiation time-points.** **a)** Violin plot for single cell transcriptome-based cell-cycle analysis showing G2M and S score for each cluster. **b-c)** Heatmap of GSEA highlighting highly enriched pathways among the cycling progenitor **b)** and the pericyte clusters **c)**. Colors indicate significance based on  $-\log_{10}$  P-value. Orange color represents upregulated and blue are downregulated pathways. **d)** GSEA enrichment plot for Defense response pathways that is enriched in OPC3. **e)** Violin plot showing the expression of genes responsible for immune and defense responses in different OPC sub-populations. **f)** table showing number and percentage of cells expressing OL and astrocyte markers at different time-points. **g-h)** A bar graph depicting the frequency of each cluster **f)** and cell type **g)** per time point.



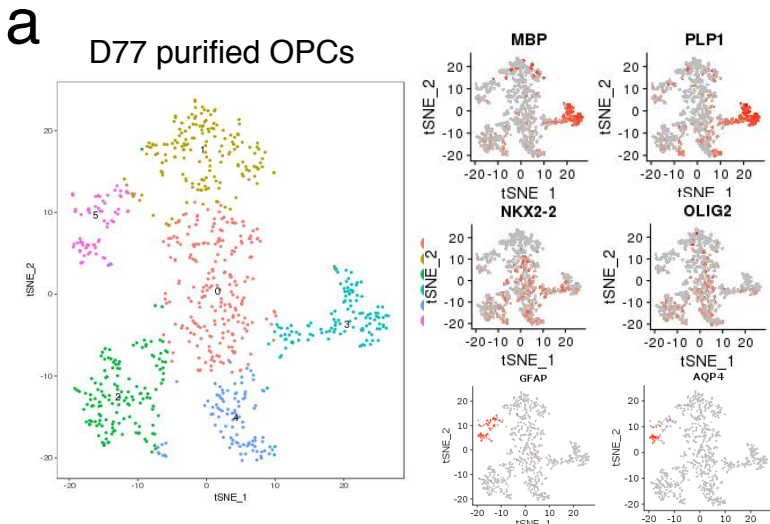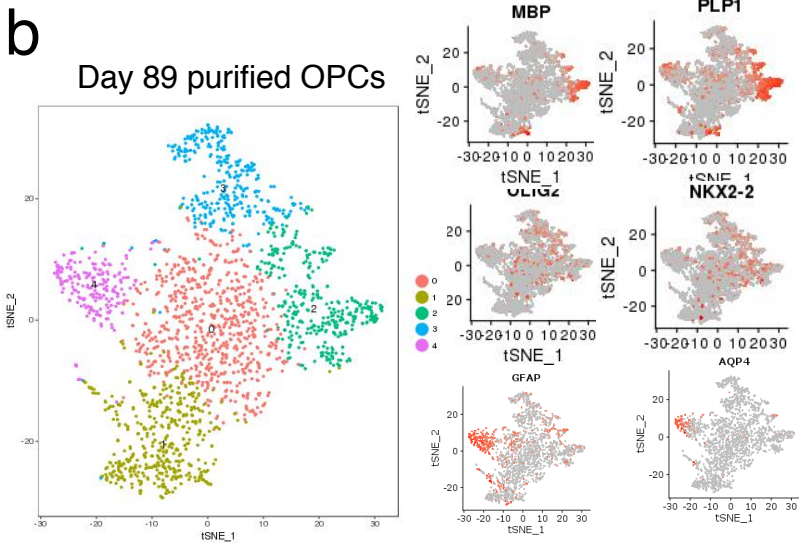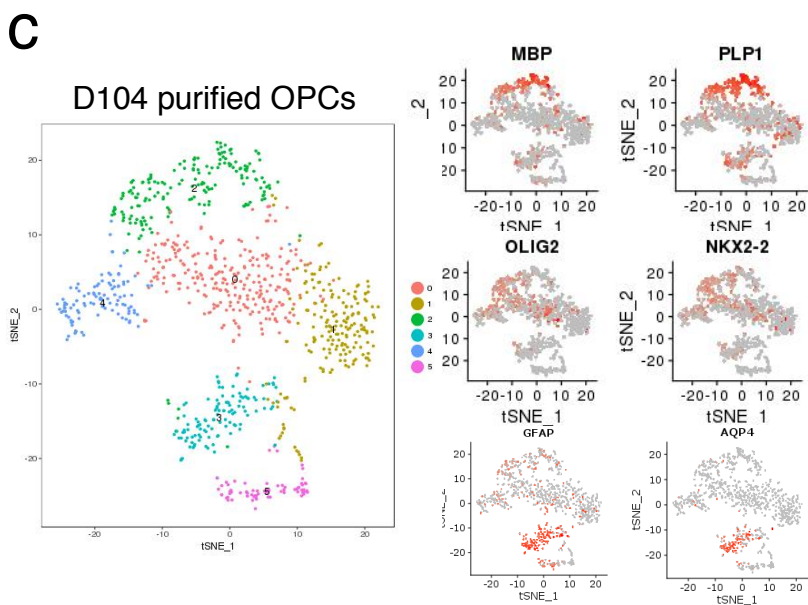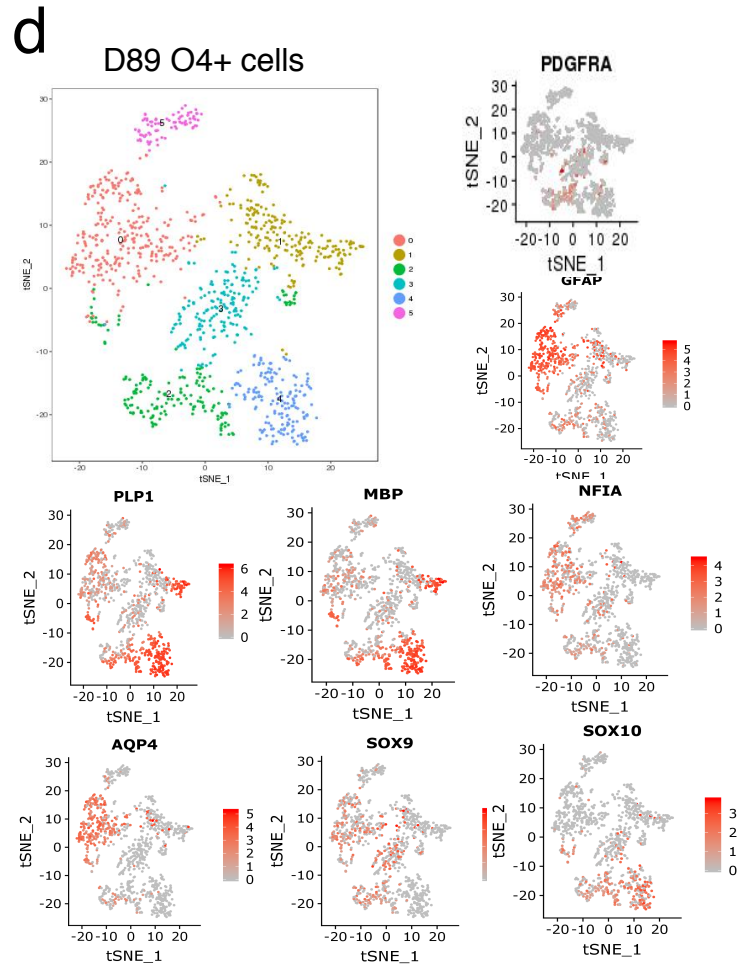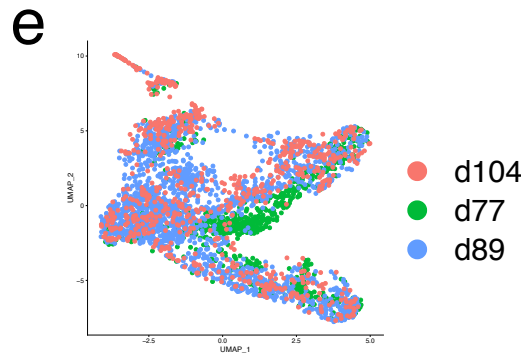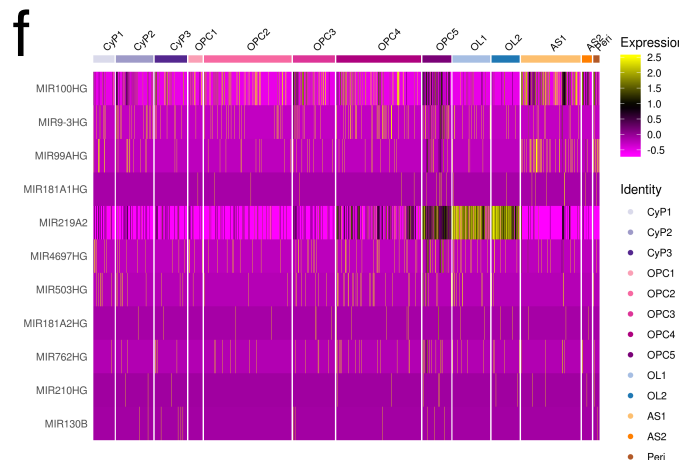

**Supplementary Figure 6. scRNAseq analysis of the purified PDTT reporter OPCs separated by different differentiation time-points. a-c)** t-SNE based unsupervised clustering of single cells captured from PDGFR $\alpha$ +tdTomato+ reporter OPCs at different stages of differentiation: **a)** day 77, **b)** day 89, and **c)** day 104. Cluster specific enrichment of various OL and astrocyte markers indicate OLLC and ALC subgroups of PDGFR $\alpha$ + cells in each time-point. **d)** PD-TT cells at day 89 of differentiation were MACS purified using O4 beads and processed for scRNAseq with Drop-seq. t-SNE based unsupervised clustering and heatmap showing expression patterns of OL and astrocyte markers of day 89 PDTT cells enriched using O4 microbeads. **e)** Cells in the UMAP plot labelled by the day at which they were purified (day 77, 89, or 104). **f)** Heatmap of pri-microRNAs captured by scRNAseq analysis. miR219 is enriched in OL clusters, miR99AHG and miR100HG are enriched in astrocyte clusters.

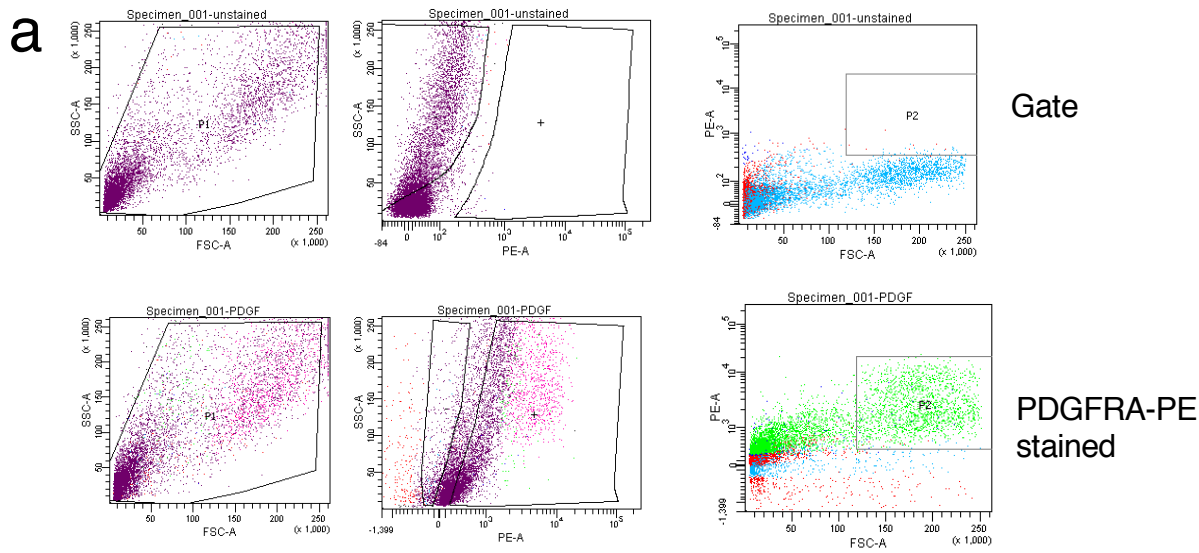

**b**

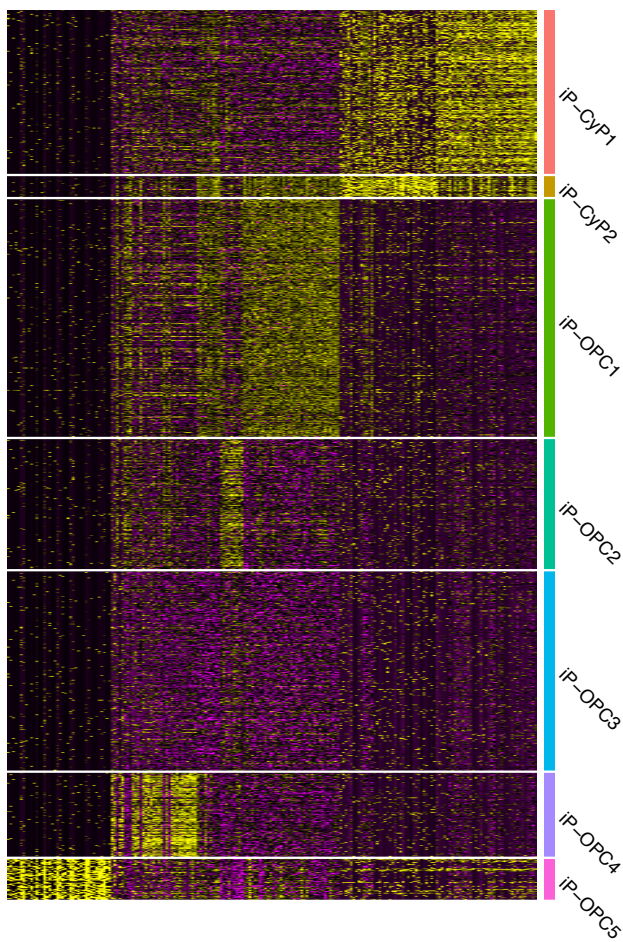

**c**

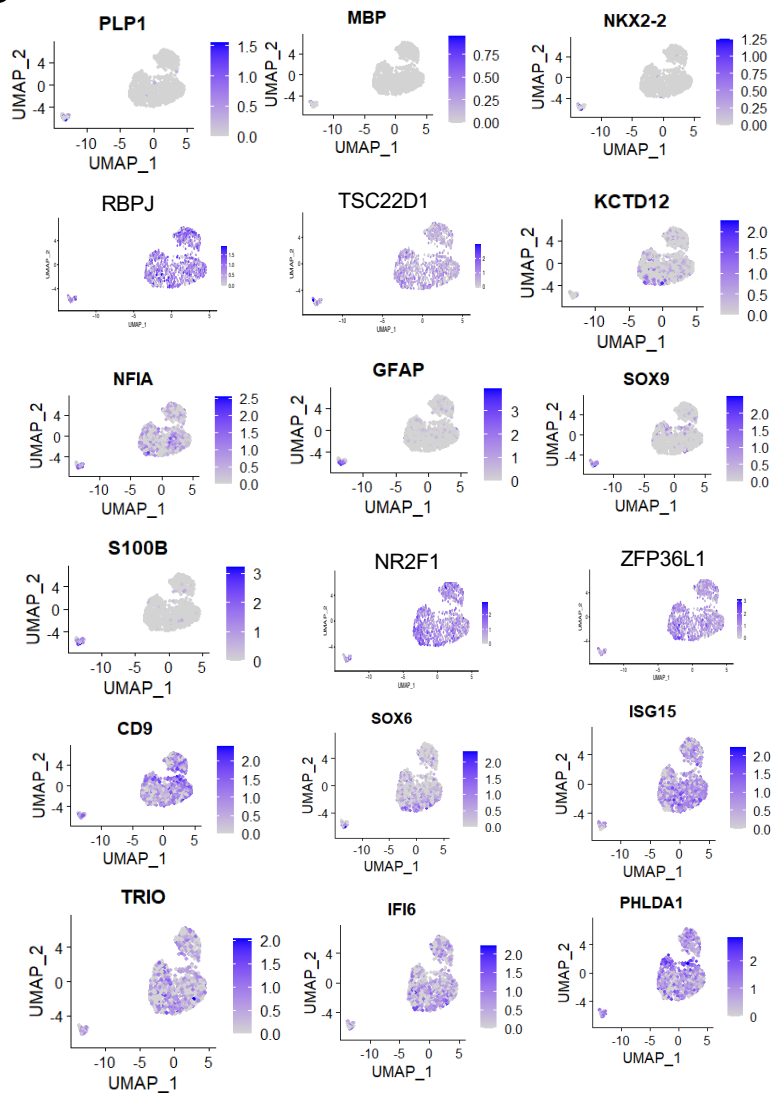

**Supplemental Figure 7. Bioinformatic analysis of the hiPSC-derived PDGFRA+ OPCs.** a) hiPSC-derived, day 60 OPCs were stained with antibody against PDGFRA and FACS-purified. Top panel shows the gate used for the FACS. Single cells from the FACS-purified samples were captured using the 10X-genomics platform, and their transcriptome was sequenced and analyzed. b) An expression heatmap of all the enriched genes from each cluster. c) Distribution of various genetic markers among the different clusters presented as an enrichment heatmap.



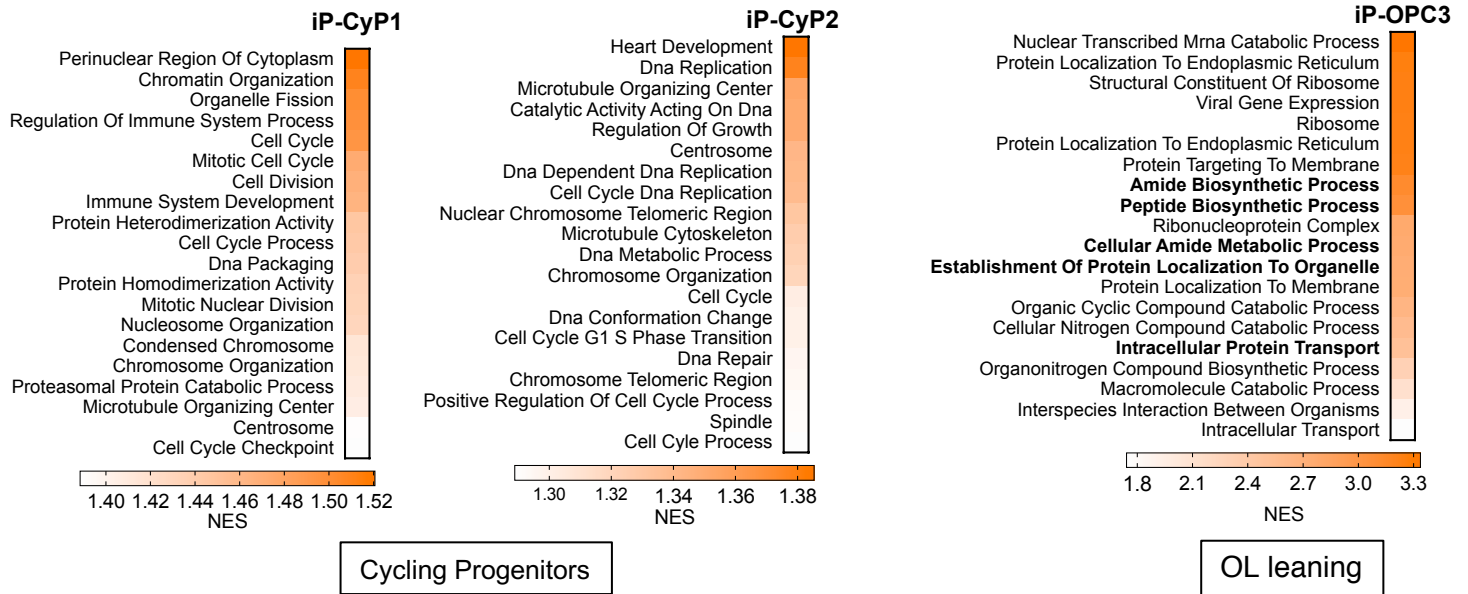

**Supplementary Figure 8. Go term analysis of sub-population of hiPSC-derived PDGFRa+ OPCs.** Heatmaps of GSEA shows cluster-specific enrichment cell cycle related pathways (iP-Cyp1 and iP-CyP2) and OL-related pathways iP-OPC3. Detailed GSEA for all the clusters are listed in Supplementary Data 7. Orange represents enrichment.

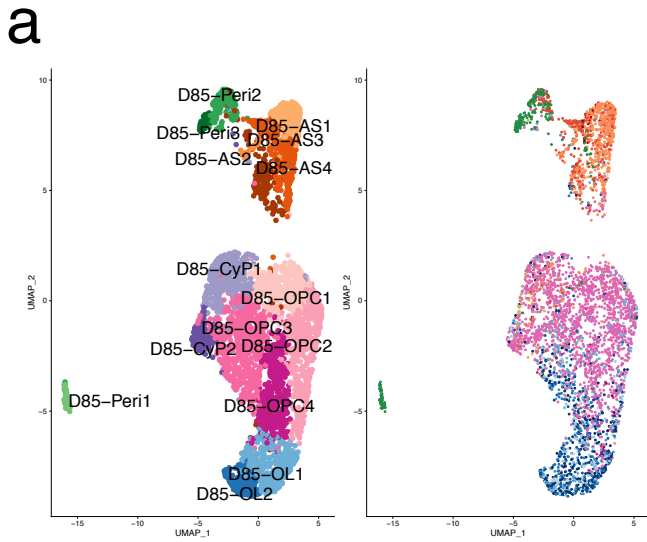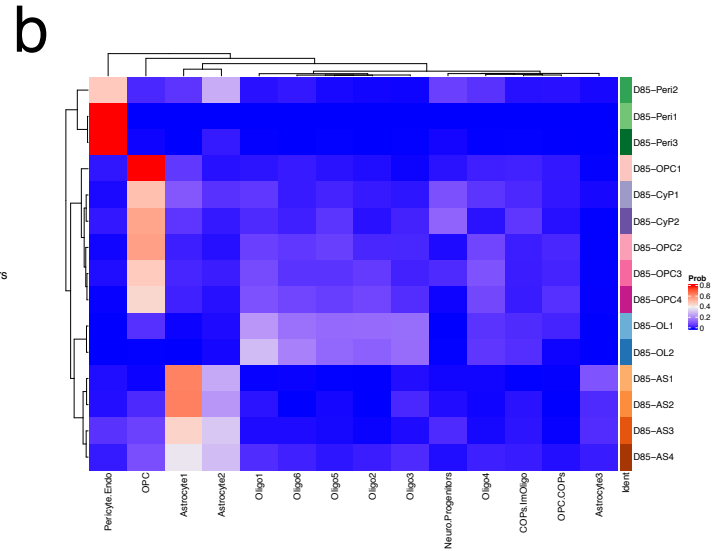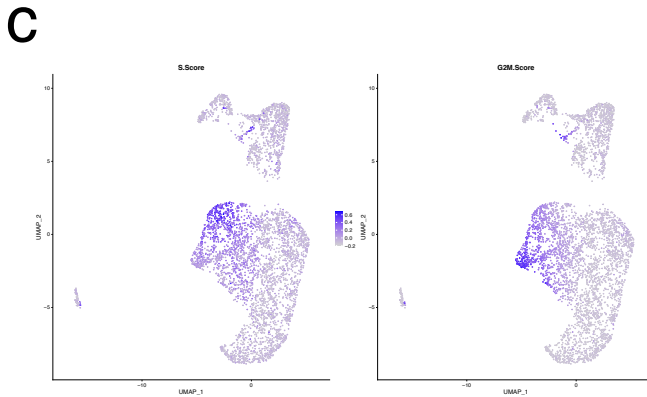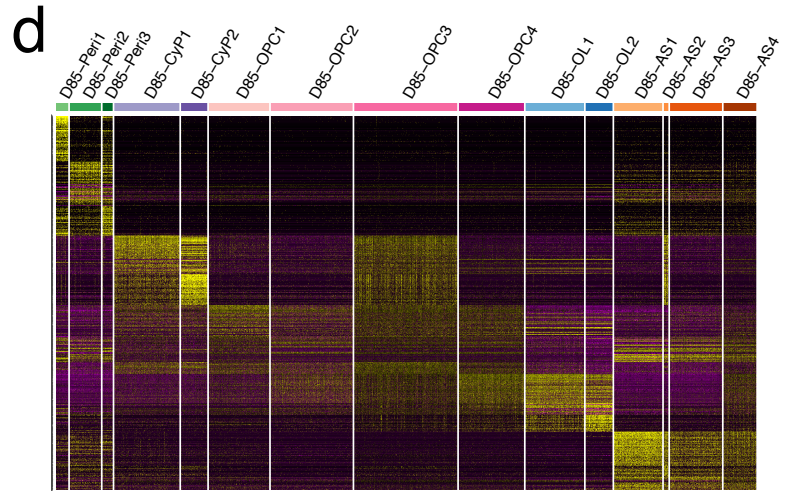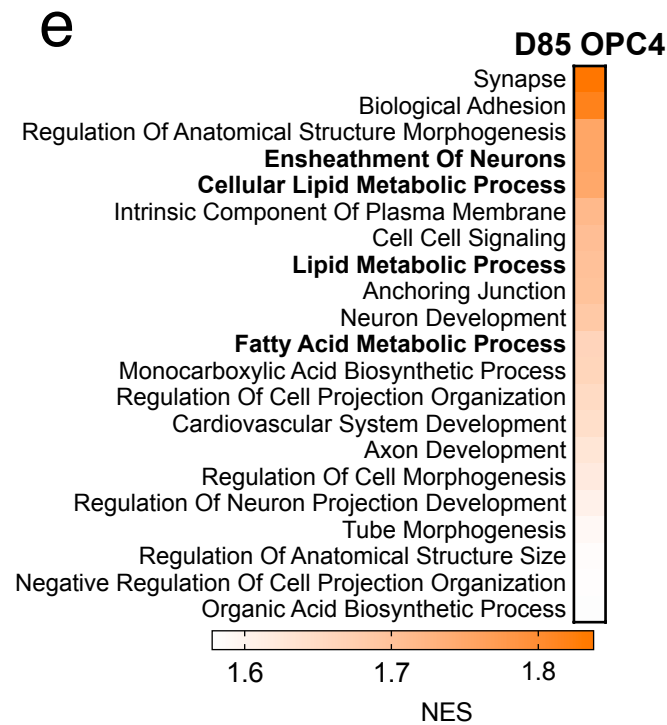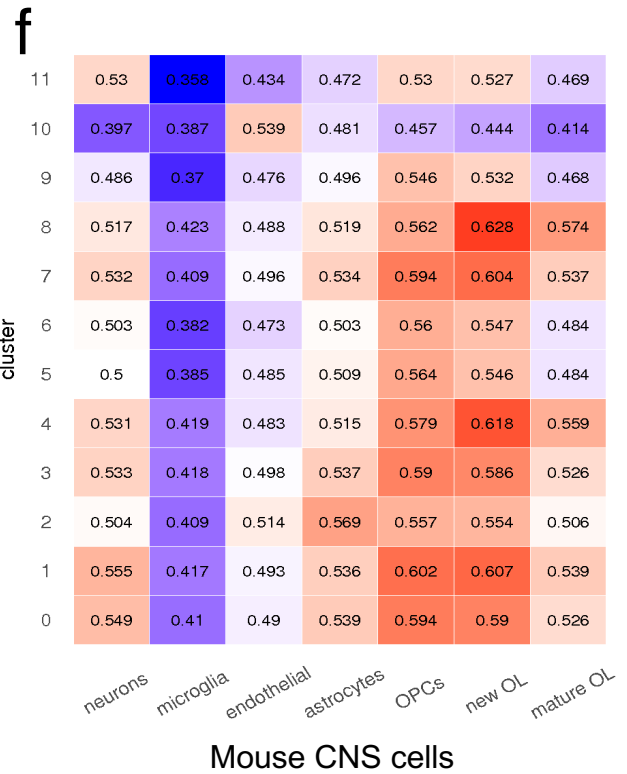

**Supplementary Figure 9. Single cell transcriptomic analysis of D85 purified OPCs. a)**

Unsupervised clustering of the single cell transcriptional profiles of D85 purified PDGFR $\alpha$ -tdTomato<sup>+</sup> cells from an independent batch of differentiation and assignment of predicted label to each cell in our dataset. **b)** Average cell-type label probability per cluster transferred from the combined reference. Red is used to indicate high and blue is for lower probability. **c)** Cell-cycle analysis showing cells at G2M and S score for each cell. Blue indicates higher score. **d)** An expression heatmap of all the enriched genes from each cluster. Yellow represents enriched expression. **e)** Heatmap of GSEA for OPC sub-clusters highlighting OL-related pathways (OPC4). Detailed GSEA for all the clusters are listed in Supplementary Data 6. Orange represents enrichment. **f)** Spearman correlation of single cell transcriptome-based clusters with RNAseq data from primary mouse brain cells.<sup>3</sup>

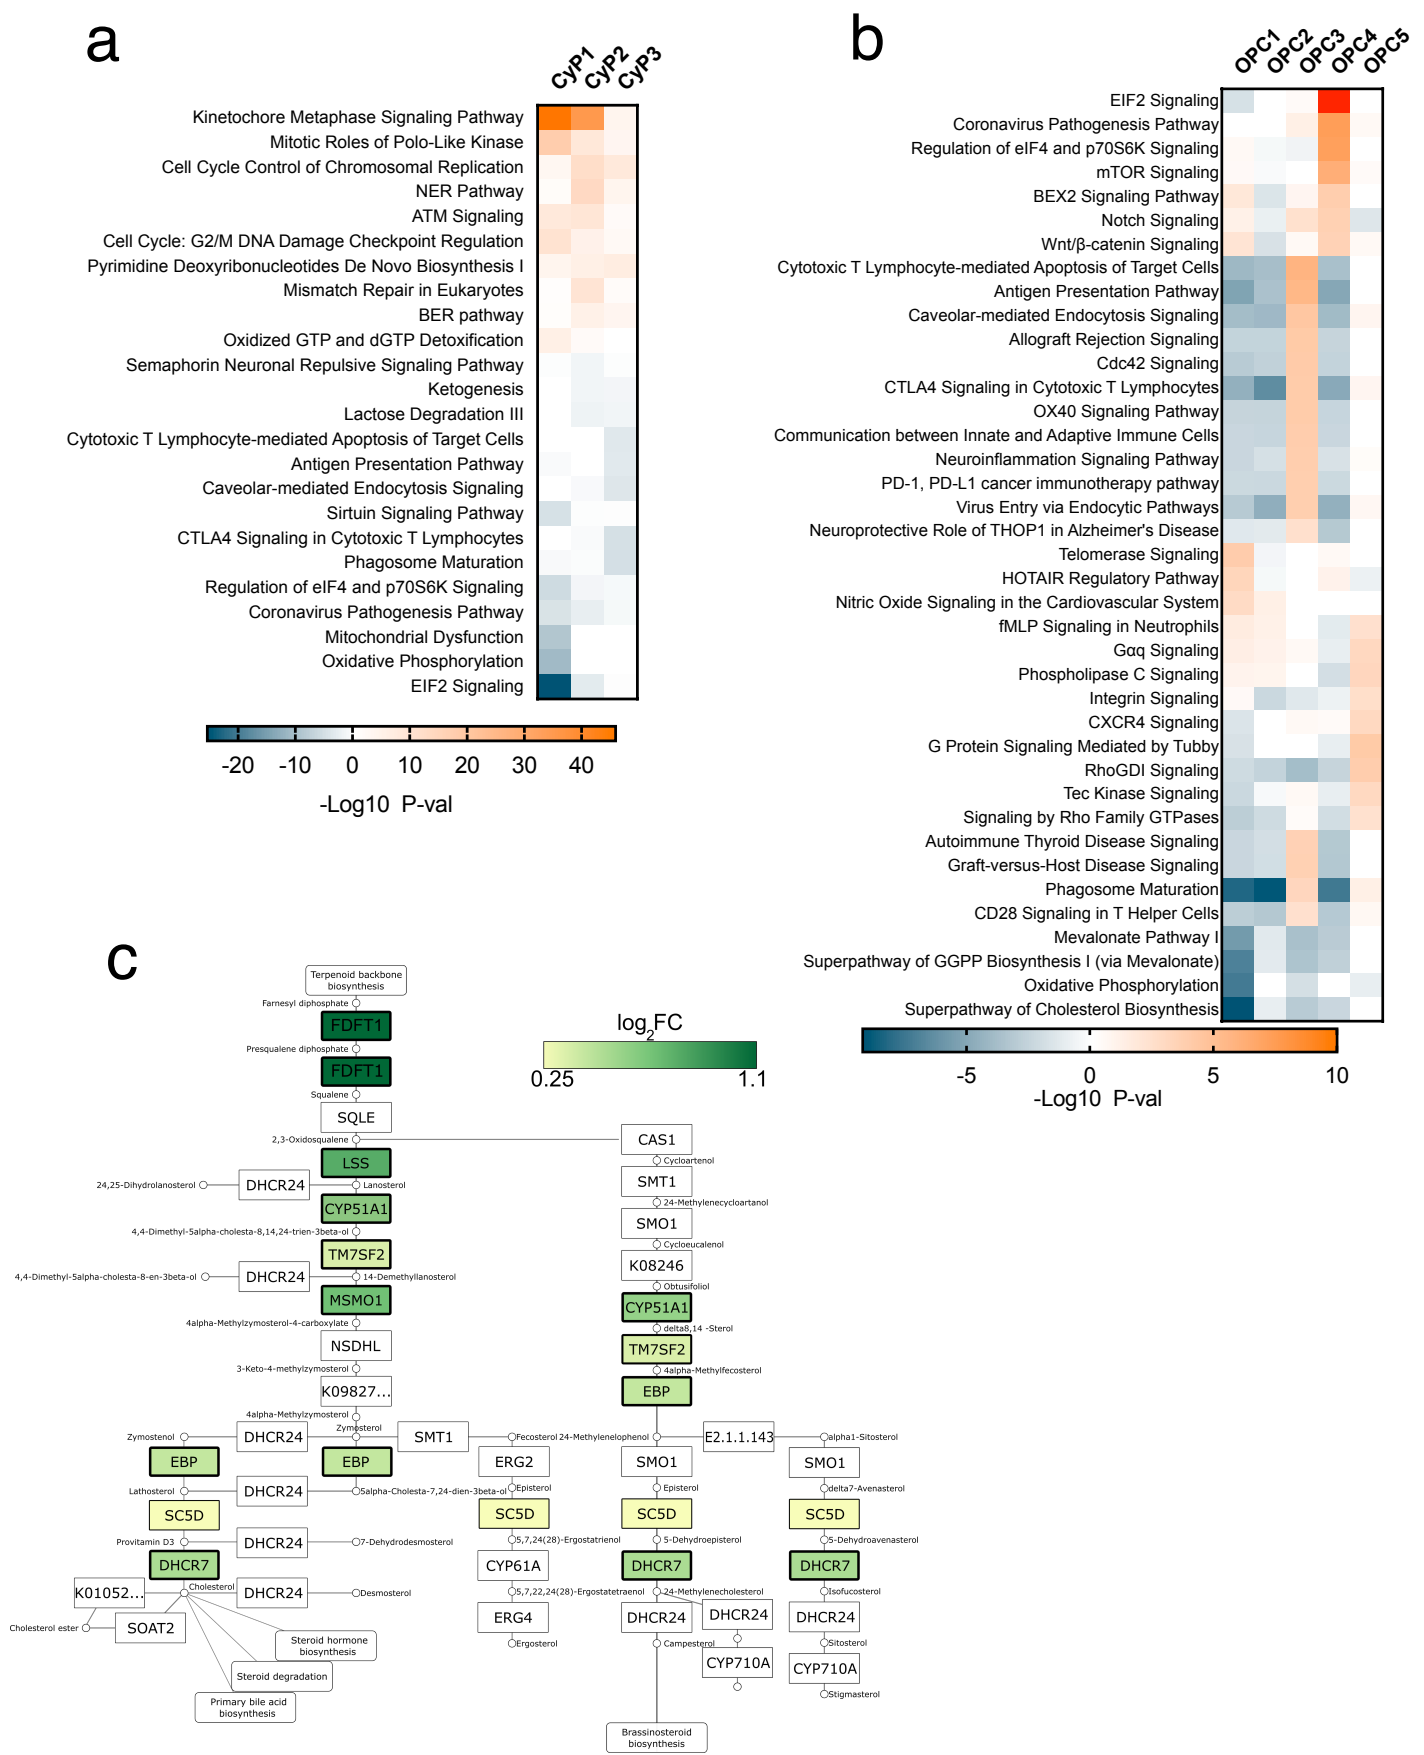

**Supplementary Figure 10. Pathway analysis of the differentially expressed genes. a)** Top enriched pathways implicated for a) cycling progenitor and b) OPC sub-clusters presented as a heatmap. Colors indicate significance based on  $-\log_{10} P$ -value. Orange color represents upregulated and blue are downregulated pathways. c) A map for KEGG steroid biosynthesis pathway (analogous to cholesterol pathway in IPA), which is highly enriched within the mature OL1 and OL2 clusters, is presented here as an example. Colored boxes denote genes that are significantly enriched based on our RNA-seq data. Green represents higher enrichment.

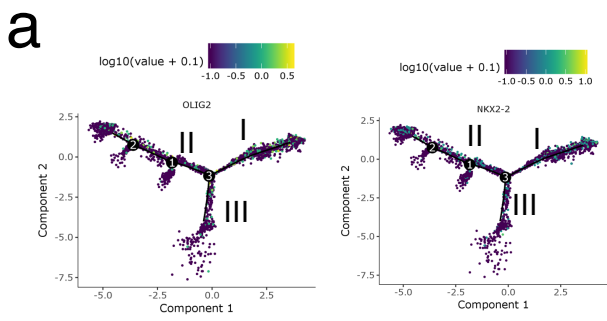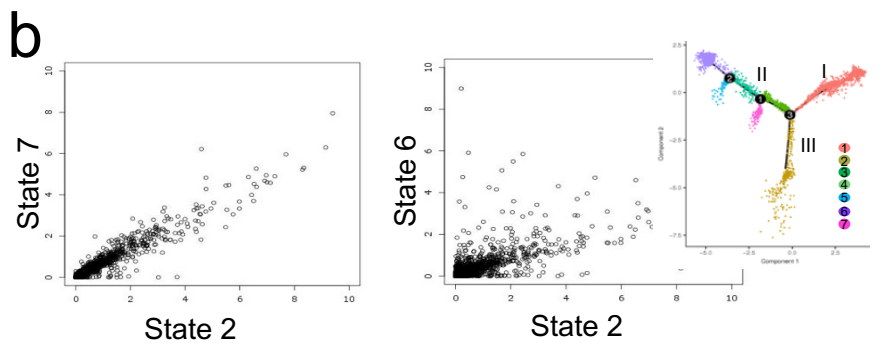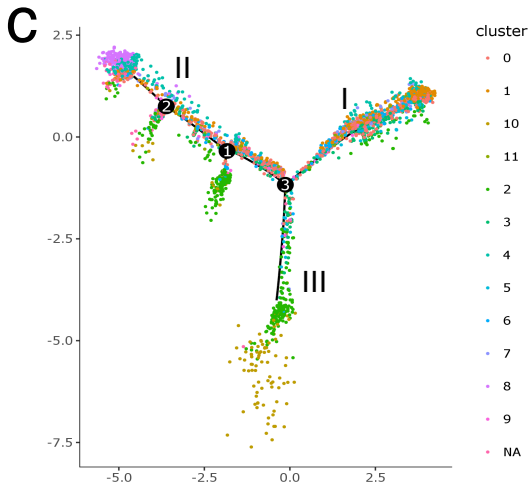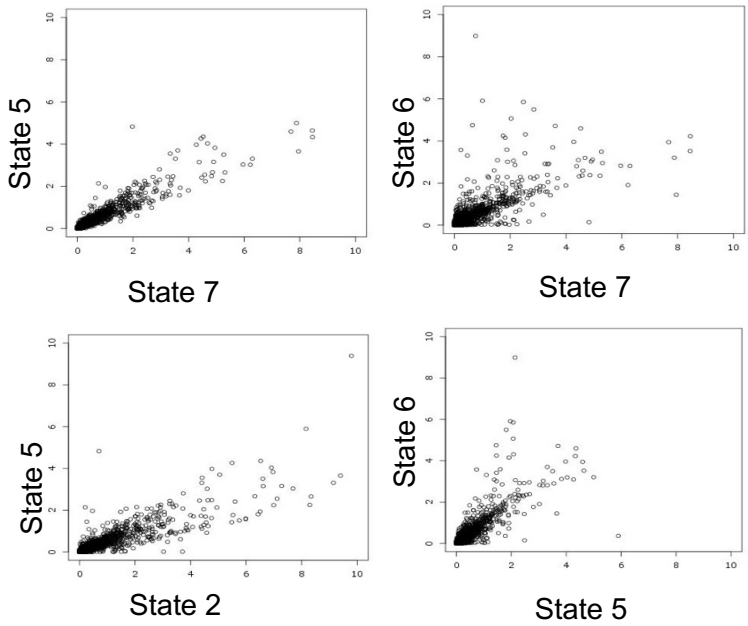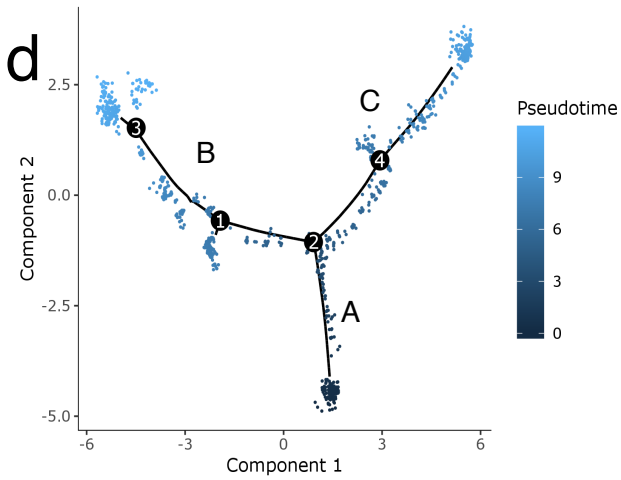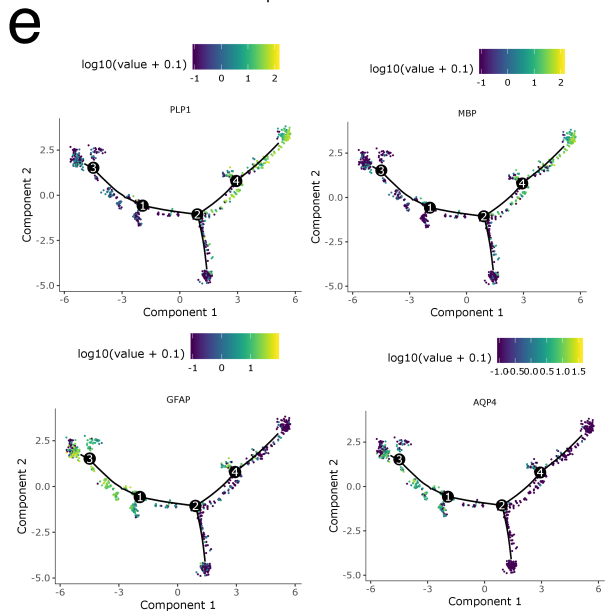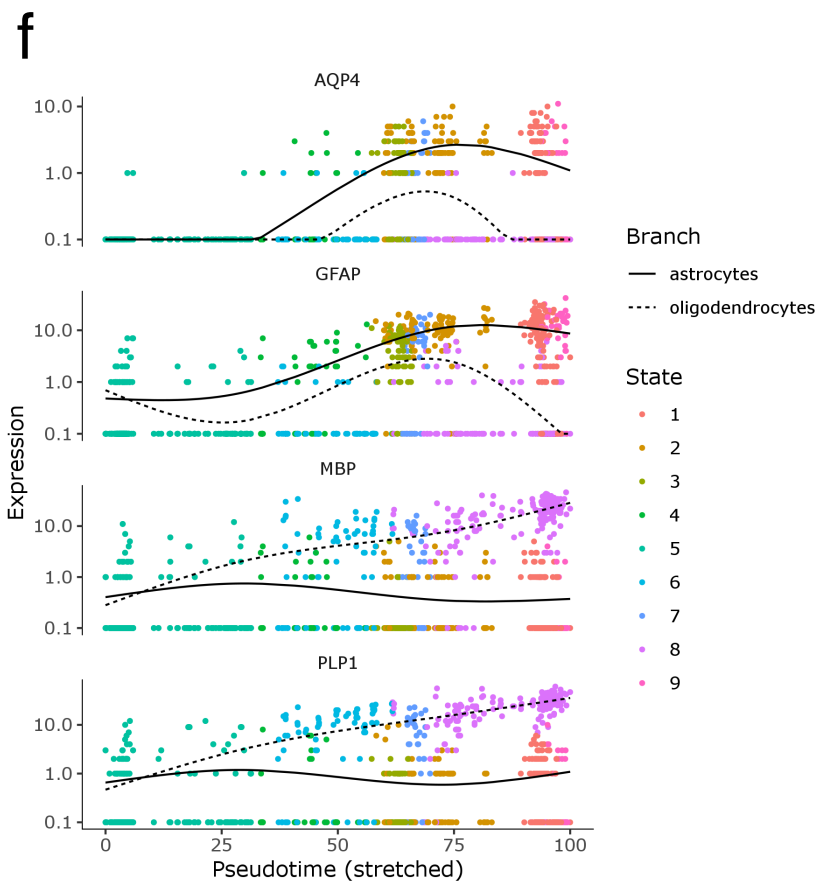

**Supplementary Figure 11. Monocle-2 analysis of the PDDT reporter cells purified with Thy1.2 or O4+ microbeads.** **a)** Within the trajectories derived from the PDDT OPCs purified with Thy1.2 microbeads, OLLC markers (*OLIG2* and *NKX2-2*) show higher expression in Path I and II, but not in Path III or the smaller branches that emerge along Path II. **b)** Scatterplot showing the average gene expression of the cells in astrocyte vs oligodendrocyte states. Each dot represents a gene and axes are average number of transcripts per cell. Cells from the small branches (state 5 and 7) have higher correlation with astrocytes (state 2 cells) than oligodendrocytes (state 6 cells). Inset shows cells at different states. **c)** Overlay of cells from each cluster from figure 4a onto the pseudo-temporal trajectory showing where in the trajectory the cells from each cluster are located. Cells from cluster 0, 1, and 3 make up the majority of Path I population. Cells from astrocyte cluster (cluster 2) make up the majority of population on Path III (state 2 cells) and the sub-branches within Path II (state 5 and 7 cells). Cells from cluster 4 and 8 are located at the end of Path II (state 6 cells). Cells from cluster 10 are located at the end of Path III or state 2 cells. **d)** Developmental trajectories of the O4 microbead enriched day 89 reporter OPCs, generated using Monocle-2. Developmentally younger cells (A) represent OPCs and fall on shorter branch. OPCs have two prominent developmental paths B and C. **e)** Expression of OL and astrocyte markers within the trajectory show enrichment of astrocyte makers (*GFAP*, *AQP4*) on Path B and OLLC markers (*MBP*, *PLP1*) on Path C. Green/yellow represents increased expression. **f)** Pseudotemporal expression pattern of OL and astrocyte genes showing kinetic trend of the OL, (*MBP* and *PLP1*) and astrocyte (*GFAP* and *AQP4*) marker genes.



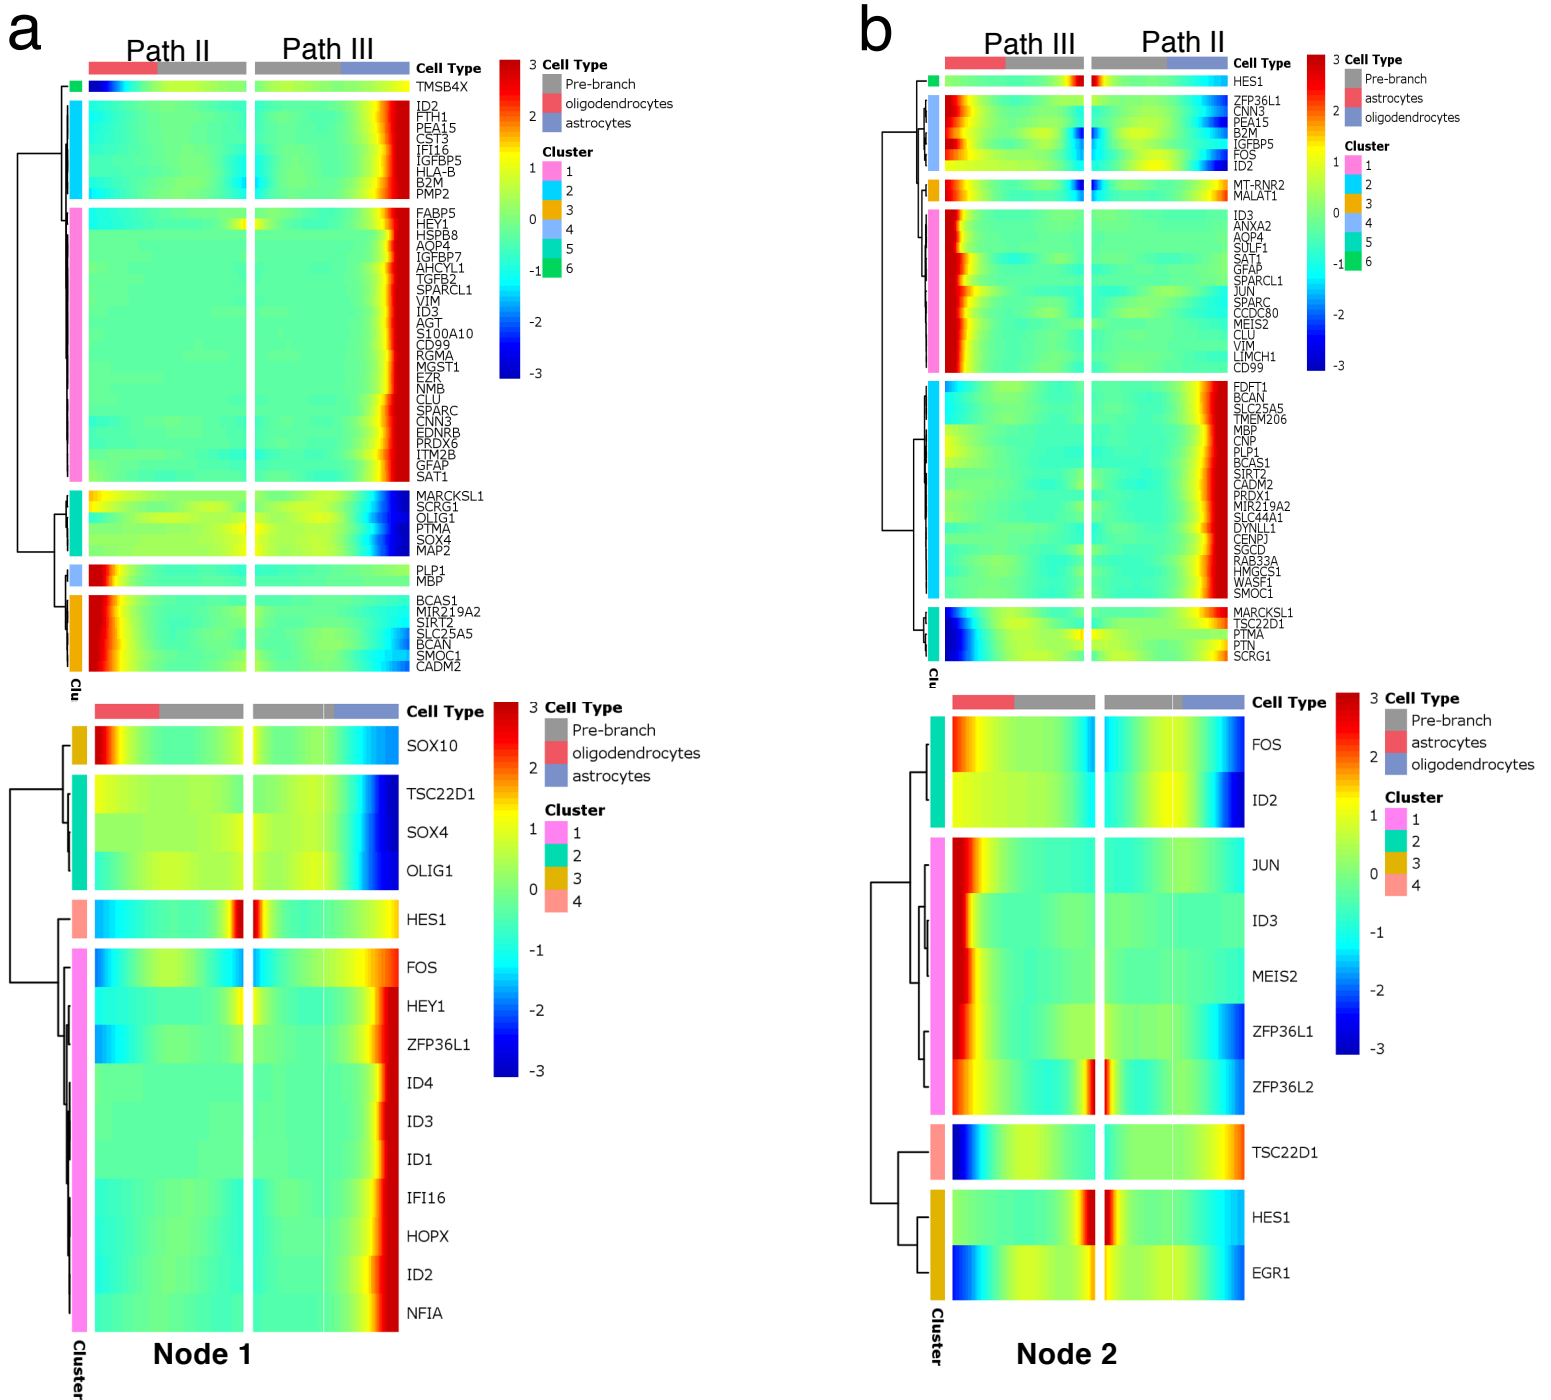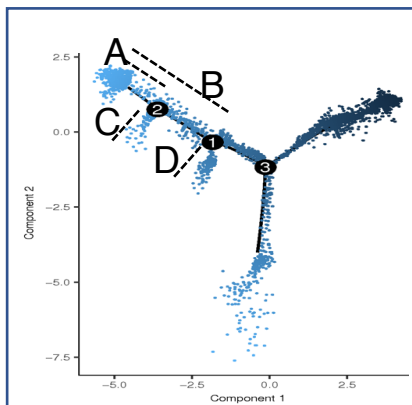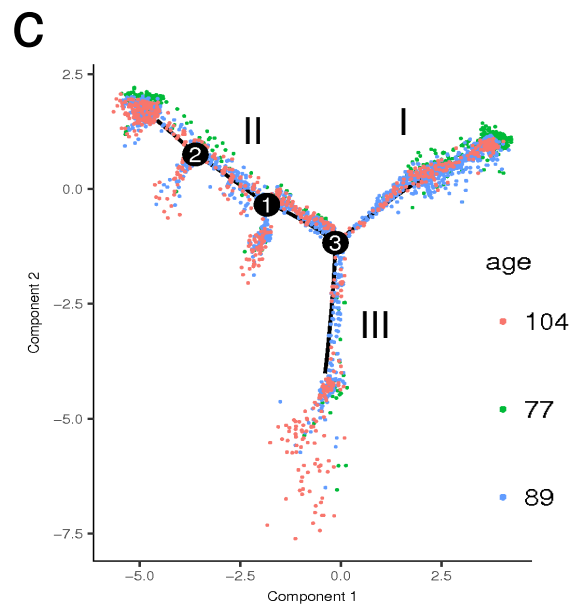

**Supplementary Figure 12. Heatmap of the most differentially expressed genes between different sub-branches of the monocle-2-based trajectories. a and b)** Differential heatmap capturing the most differentially expressed genes **(a)** and transcription factors **(b)** between Paths II (oligodendrocytes) and III (astrocytes) identified by BEAM and clustered according to their expression pattern. Red color represents upregulation and blue is used for downregulation. Analysis of differential expression at node 2 represents genes from sub-branch A vs C **(b)**, and node 1 represents sub-branch B vs D **(a)**. See inset on the bottom left for labelling of nodes and sub-branches. **c)** Cells in each path of the trajectory are labelled by day at which they were purified (day 77, 89, or 104). Although some enrichment of day 104 cells is seen in the mature clusters, each path consists of cells from all three ages.

**Supplementary Table 1. Oligonucleotides used for this study.**

|                                       |                                                          |
|---------------------------------------|----------------------------------------------------------|
| <b>Primers for Reporter Cell line</b> |                                                          |
| PDGFRa guide F                        | caccAGACAGCTTCCTGTAAGTGG                                 |
| PDGFRa guide R                        | aaacCCAGTTACAGGAAGCTGTCT                                 |
| PDGFRa homology arm PCR-F             | TTGGGGGTCTGCGATGGAAC                                     |
| PDGFRa homology arm PCR-R             | TGGGGTCCGCAAAGCTTTTCAT                                   |
| PDGFRa genotyping-F                   | GAGACGGGTTCCAGCAGTTCCA                                   |
| PDGFRa genotyping-R                   | CATCCTGGCTGCCACACACA                                     |
| PDGFRa-gibson 1F                      | TAAGTGGCGGATTCGAGGGGTT                                   |
| PDGFRa-gibson 1R                      | CAGGAAGCTGTCTTCCACCAGGTCT                                |
| PDGFRa-gibson 2F                      | AGACCTGGTGGAAAGACAGCTTCCTGGGGAGCGG<br>AGCTACTAAGTTCAGCCT |
| PDGFRa-gibson 2R                      | AGGAACCCCTCGAATCCGCCAGTTATCACAGAGA<br>AATGAAGTCCAGGGCTTG |
| <b>Off-target Primers</b>             |                                                          |
| Chr16:68022301-F                      | CCAAGTCAGCTGGGCCTTCTGC                                   |
| Chr16:68022301-R                      | GGAGGCTGCGCCTGAAGTCGT                                    |
| Chr11:113559618-F                     | GGTCTCCACTCCTCCCCGTACCC                                  |
| Chr11:113559618-R                     | GCCCAGGCCAGGGGAGCTAA                                     |
| Chr10:25104942-F                      | TGGCCTTGCCACCTGAGAAATGA                                  |
| Chr10:25104942-R                      | GCCCAGAAAGGATGGGAGACAGG                                  |
| Chr2:72465148-F                       | GCATGCGCCTTTATATACTGAAAATCTTCCTG                         |
| Chr2:72465148-R                       | GACTGTGATATGTATGGCTCAGTATTCCCAGTT                        |
| Chr1:65513195-F                       | TTACAGCATGGTGCCCTCATCAA                                  |
| Chr1:65513195-R                       | TTTTCCAGAGCCCAGGTTCTAATTCTGA                             |
| <b>qTR-PCR primers</b>                |                                                          |
| qhGAPDH_F                             | GGAGCGAGATCCCTCCAAAAT                                    |
| qhGAPDH_R                             | GGCTGTTGTCATACTTCTCATGG                                  |
| qhPDGFRa_F;                           | CCTTGGTGGCACCCCTTAC                                      |
| qhPDGFRa_R                            | TCCGGTACCCACTCTTGATCTT                                   |
| qhSOX10_F                             | CCTCACAGATCGCCTACACC                                     |
| qhSOX10_R                             | CATATAGGAGAAGGCCGAGTAGA                                  |
| qhGFAP_F                              | CATCGAGATCGCCACCTACA                                     |
| qhGFAP_R                              | TCTGCACGGGAATGGTGAT                                      |
| qhOLIG2_F                             | GGCGCGCAACTACATCCT                                       |
| qhOLIG2_R                             | CGCTCACCAGTCGCTTCAT                                      |
| qhMBP-F                               | AAGGCCAGAGACCAGGATTT                                     |
| qhMBP-R                               | TCCCTTGAATCCCTTGTGAG                                     |
| qhENPP6-F                             | GACCGCCTGAACGTCATTAT                                     |
| qhENPP6-R                             | TCACTTGCTGCAGGTCATTC                                     |
| qhNG2-F                               | TATGTTGGCCAGACTTGAT                                      |
| qhNG2-R                               | TGCAGGTCTATGTCGGTCAG                                     |

**Supplementary Table 2. Key reagents used for the study.**

| <b>REAGENT or RESOURCE</b>                                  | <b>SOURCE</b>           | <b>IDENTIFIER</b>              | <b>Dilution used</b> |
|-------------------------------------------------------------|-------------------------|--------------------------------|----------------------|
| <b><u>Antibodies</u></b>                                    |                         |                                |                      |
| Anti-PDGFR alpha                                            | R&D Systems             | AF-307-SP                      | 1:200                |
| PE anti-human CD140a (PDGFRalpha)                           | BioLegend               | 323505                         | 1:100                |
| Anti-SOX10                                                  | R&D Systems             | AF2864-SP                      | 1:100                |
| Anti-NKX2.2                                                 | DSHB                    | Cat# 74.5A5;<br>RRID:AB_531794 | 1:50                 |
| Anti-MBP                                                    | Millipore               | Cat# MAB386;<br>RRID:AB_94975  | 1:100                |
| Anti-OLIG2                                                  | Millipore               | Cat# AB9610,<br>RRID:AB_570666 | 1:500                |
| Anti-O4 clone 81                                            | Millipore               | MAB345                         | 1:200                |
| Hoechst 33342                                               | ThermoFisher Scientific | H3570                          | 1:10,000             |
| Alexa Fluor 488 goat anti-rabbit IgG                        | ThermoFisher Scientific | A-11034                        | 1:500                |
| Alexa Fluor 488 goat anti-mouse IgM                         | ThermoFisher Scientific | A-21042                        | 1:500                |
| Alexa Fluor 647 goat anti-rabbit IgG                        | ThermoFisher Scientific | A-21245                        | 1:500                |
| Alexa Fluor 647 donkey anti-goat IgG                        | ThermoFisher Scientific | A-21447                        | 1:500                |
| <b><u>Chemicals, Peptides, and Recombinant Proteins</u></b> |                         |                                |                      |
| mTeSR1                                                      | Stem Cell Technologies  | 5850                           |                      |
| StemFlex                                                    | ThermoFisher Scientific | A3349401                       |                      |
| DMEM/F12                                                    | ThermoFisher Scientific | 11320082                       |                      |
| Accutase                                                    | ThermoFisher Scientific | A11105-01                      |                      |
| Antibiotic-Antimycotic                                      | ThermoFisher Scientific | 15240062                       |                      |
| Growth Factor Reduced BD Matrigel™ Matrix                   | BD Biosciences          | 354230                         |                      |
| Blebbistatin                                                | Sigma                   | B0560-1MG                      |                      |
| Opti-MEM™ I Reduced Serum Medium                            | ThermoFisher Scientific | 31985088                       |                      |
| CryoStor® CS10                                              | Stem Cell Technologies  | 7930                           |                      |
| Lipofectamine™ Stem Transfection Reagent                    | ThermoFisher Scientific | STEM00001                      |                      |
| Puromycin                                                   | ThermoFisher Scientific | A11138-03                      |                      |
| N2 supplement                                               | ThermoFisher Scientific | 17502-048                      |                      |
| B27 Supplement without vitamin A                            | ThermoFisher Scientific | 12587-010                      |                      |
| SB431542                                                    | Stem Cell Technologies  | 72234                          |                      |
| LDN193189                                                   | Stem Cell Technologies  | 72147                          |                      |
| Smoothened agonist                                          | Sigma                   | R2625                          |                      |
| All-trans retinoic acid                                     | Millipore               | 566660                         |                      |
| Recombinant human PDGF-AA                                   | R&D Systems             | 221-AA-050                     |                      |

| <b>REAGENT or RESOURCE</b>                    | <b>SOURCE</b>               | <b>IDENTIFIER</b>                                                                                                                             |
|-----------------------------------------------|-----------------------------|-----------------------------------------------------------------------------------------------------------------------------------------------|
| Recombinant human IGF-I                       | R&D Systems                 | 291-G1-200                                                                                                                                    |
| Recombinant human HGF                         | R&D Systems                 | 294-HG-025                                                                                                                                    |
| Neurotrophin 3 (NT3)                          | Millipore                   | GF031                                                                                                                                         |
| cAMP analog                                   | Sigma                       | D0260                                                                                                                                         |
| 3,3,5-Triiodo-L-thyronine (T3)                | Sigma                       | T2877                                                                                                                                         |
| L-Ascorbic acid                               | Sigma                       | A4403                                                                                                                                         |
| Insulin solution human                        | Sigma                       | 19278                                                                                                                                         |
| Biotin                                        | Sigma                       | 4639                                                                                                                                          |
| Poly-L-ornithine hydrobromide                 | Sigma                       | 3655                                                                                                                                          |
| HEPES (1 M)                                   | ThermoFisher Scientific     | 15630080                                                                                                                                      |
| Laminin                                       | MilliporeSigma              | L2020-1MG                                                                                                                                     |
| <b><u>Critical Commercial Assays</u></b>      |                             |                                                                                                                                               |
| MycoAlert Mycoplasma Detection kit            | Lonza                       | LT07-218                                                                                                                                      |
| hPSC Genetic Analysis Kit                     | StemCell Technologies       | 7550                                                                                                                                          |
| <b><u>Deposited Data</u></b>                  |                             |                                                                                                                                               |
| RNAseq                                        | This paper                  | <a href="https://www.ncbi.nlm.nih.gov/geo/query/acc.cgi?acc=GSE146373">https://www.ncbi.nlm.nih.gov/geo/query/acc.cgi?acc=GSE146373</a>       |
| Human reference genome NCBI build 37, GRCh37  | Genome Reference Consortium | <a href="http://www.ncbi.nlm.nih.gov/projects/genome/assembly/grc/human/">http://www.ncbi.nlm.nih.gov/projects/genome/assembly/grc/human/</a> |
| RNAseq on the human and mouse CNS cells       | Barres Lab                  | GSE52564, and GSE73721                                                                                                                        |
| Human single cell data                        |                             | GEO database (GSE118257, GSE104276), Bioproject (544731)                                                                                      |
| <b><u>Experimental Models: Cell Lines</u></b> |                             |                                                                                                                                               |
| Passage 40 hESC (WA09) or H9 NIH HES # 0062   | WiCell                      | RRID:CVCL_9773                                                                                                                                |
| hiPCS                                         | Dr. Katie Whartenby Lab     |                                                                                                                                               |
| PD-TT (the PDGFRa-tdTomato-Thy1.2 reporter)   | This paper                  |                                                                                                                                               |
| <b><u>Recombinant DNA</u></b>                 |                             |                                                                                                                                               |
| PX459.V2                                      | Addgene                     | RRID:Addgene_62988                                                                                                                            |
| ZeroBlunt TOPO                                | ThermoFisher Scientific     | K280020                                                                                                                                       |
