# Supplementary material for: Single-cell transcriptomic reveals molecular diversity and developmental heterogeneity of human stem cell-derived oligodendrocyte lineage cells
Source: PubMed Central journal article supplement (PMC7844020; doi:10.1038/s41467-021-20892-3), 2021-01-28
Supplement: 41467_2021_20892_MOESM3_ESM.pdf [file 41467_2021_20892_MOESM3_ESM.pdf]

## Description of Additional Supplementary Files

**Supplementary Movie 1.** A 6 hour long time-lapse video of the PD-TT reporter cells at day 45 of differentiation. First few tdTomato+ OPCs are seen migrating out of the neurosphere (bottom of the image) plated on a surface coated with poly-L-ornithine and laminin.

**Supplementary Movie 2.** Time-lapse video of the PD-TT reporter cells at day 65 of differentiation taken over 18 hours. Numerous tdTomato+ OPCs have migrated out of the neurosphere (at the center of the image) and are seen moving around on a coverslip coated with poly-L-ornithine and laminin.

**Supplementary Data 1.** List of the differentially expressed genes from each cluster.

**Supplementary Data 2.** List of the differentially expressed genes between the individual OPC sub-clusters (i.e., CyP2, CyP2, and OPC1-5).

**Supplementary Data 3.** List of the all the pathways produced by Gene Set Enrichment Analysis for each cluster. For the analysis restricted only to OPC sub-clusters, both upregulated and downregulated pathways are included on the same sheet.

**Supplementary Data 4.** List of the positively and negatively regulated canonical pathways and their associated transcripts for each cluster.

**Supplementary Data 5.** Quality control dataset listing number of genes, UMIs and %mitochondrial reads for each cell. A table with number of cells for each cluster per time-point is also included.

**Supplementary Data 6.** List of all the differentially expressed genes and all the pathways produced by Gene Set Enrichment Analysis for each cluster of D85 PDDT OLLCs.

**Supplementary Data 7.** List of all the differentially expressed genes and all the pathways produced by Gene Set Enrichment Analysis for each cluster of iPSC-OPCs.
